# Supplementary material for: Allele-Specific Methylation of SPDEF: A Novel Moderator of Psychosocial Stress and Substance Abuse
Source: Atypon-hosted journal article supplement (doi:10.1176/appi.ajp.2018.17121360), 2018-12-11
Supplement: appi.ajp.2018.17121360.ds001.pdf [file appi.ajp.2018.17121360.ds001.pdf]

## Supplemental material

### Material and Methods

#### Behavioural data

#### *Quality control of Life Events Questionnaire*

The Life Events Questionnaire was used to assess life events experienced by individuals in the IMAGEN cohort. Participants rated their feelings towards the event (i.e. on a 5-point rating scale ranging from very unhappy [1], unhappy [2], neutral [3], happy [4], to very happy [5]) and the frequency with which the event had happened. Negative stressful life events from the Life Events Questionnaire were defined based on the quality ratings of adolescents who had experienced the event as previously described in Loth et al (1). Items were included into the negative stressful life events scale if they met the following criteria: a) were rated on average as negative as assessed by the feelings ratings in those participants who have experienced the event, b) were not phrased in an ambivalent way (e.g. “Got or gave a sexually transmitted disease” or “Broke up with a boyfriend/girlfriend”) and c) did not show low item endorsement (i.e. “Stole something valuable” was not endorsed in 95.2% of the sample; “Brother or Sister moved out” was not endorsed in 81.8%; “Family had money problems” was not endorsed by 70.3%, “Parent abused alcohol” was not endorsed by 92.7%). Based on these criteria, we classified 14 out of 39 items as assessing negative stressful life events (SLE) in an unambiguous phrasing in the contemporary adolescents.

#### *Substance use*

The European School Survey Project on Alcohol and Drugs (ESPAD)(2,3) was used to assess the frequency of smoking in the lifetime (On how many occasions during your lifetime have you smoked cigarettes?), frequency of alcohol use in the lifetime (On how many occasions

in your whole lifetime have you had any alcoholic beverage to drink?), and frequency of binge drinking in the lifetime (How many times in your whole lifetime have you had five or more drinks in a row?) in the IMAGEN sample. Subjects provided a self-report based on a scale from 0 to 6, (1 = 1–2 times; 3 = 6–9 times; 6 = 40+ times).

Omics data

### ***DNA extraction and methylation data preparation***

DNA purification was performed by the Centre National de Génotypage in Paris. DNA was extracted from whole-blood samples (~10mL) collected at the age of 14 and preserved in BD Vacutainer EDTA tubes (Becton, Dickinson and Company) using the Gentra Puregene Blood Kit (QIAGEN) according to the manufacturer's instructions. DNA methylation of first wave n=708 individuals was assessed at the SNP & SEQ Technology platform, Uppsala University. The second wave n=600 of methylation data samples were processed at the Life & Brain Centre, Bonn University and Basel University following the same protocol. DNA (500 ng) from each sample was treated with sodium bisulfite using the EZ-96 DNA methylation kit (Zymo Research, Irvine, CA, USA). DNA methylation was quantified using the Illumina Infinium HumanMethylation450 BeadChip (Illumina Inc.) run on an Illumina HiScan System (Illumina) using the manufacturers' standard protocol. Signal intensities for each probe were extracted using Illumina GenomeStudio software.

### ***Genetic data***

Genotype information was collected for 582,982 markers using DNA extracted from whole blood as previously described and the Illumina HumanHap610 Genotyping BeadChip. Single nucleotide polymorphisms with call rates of <98%, minor allele frequency <1% or deviation from the Hardy-Weinberg equilibrium ( $p \leq 1 \times 10^{-4}$ ) were excluded from the analyses. Individuals with an ambiguous sex code, excessive missing genotypes (failure rate >2%), and

outlying heterozygosity (heterozygosity rate 3 standard deviations from the mean) were also excluded. Identity-by-state similarity was used to estimate cryptic relatedness for individual using PLINK software. Closely related individuals with identity-by-descent ( $IBD > 0.1875$ ) were eliminated from the subsequent analysis. Population was examined by principal component analysis (PCA) using EIGENSTRAT software. The four HapMap populations were used as reference groups in the PCA and individuals with divergent ancestry (from CEU) were also excluded. A subset of the exploration sample ( $n = 175$ ) was not included in the analyses for SNPs rs2233632 and rs2233621 as they did not pass quality control.

### ***Pyrosequencing***

Technical validation for randomly selected subsample ( $n=94$ ) was performed using pyrosequencing and run at the Centre for Molecular Medicine, Karolinska Institutet, Stockholm, Sweden. Genomic DNA (500ng) was treated with sodium bisulfite using the EZ-96 DNA methylation Gold MagPrep kit (Zymo Research, Irvine, CA, USA). Bisulfite-converted DNA samples were used as templates for PCR reactions amplifying the hSPDEF regions containing the differentially methylated regions identified by Illumina bead array analysis. The assays were either provided by QIAGEN (hSPDEF cg16527629) or designed using Methprimer(4) (hSPDEF cg01395541) (see supplementary table 1 for primer sequences). The Pyromark PCR kit (QIAGEN) was used for amplification according to the manufacturer's protocol and conditions listed in the table. The PCR products were sequenced by Pyrosequencing on a PSQ96 (Pyrosequencing) using PyroMark Gold Q96 reagents (QIAGEN) according to the manufacturer's recommendations. The results were analysed using the PyromarkQ96 software (QIAGEN). To exclude PCR bias, standard curves for both assays were run off DNA standards (QIAGEN) with known methylation content.

Table S1

| Gene name    | Interrogated position | Forward primer (5'-3')                          | Reverse primer (5'-3')                             | Annealing T | Sequencing primer (5'-3')    | Sequence analysed                                        |
|--------------|-----------------------|-------------------------------------------------|----------------------------------------------------|-------------|------------------------------|----------------------------------------------------------|
| <i>SPDEF</i> | cg01395541            | TTTTTA<br>TGTAG<br>ATTTG<br>TTATA<br>TAGTG<br>G | CAAAT<br>ACTTA<br>ATAAT<br>AAATA<br>CCTCT<br>ATCCT | 56°C        | GTAGATT<br>TGTTATA<br>TAGTGG | CGGTGAGGAAG<br>GACTCCTAGCTC<br>GCTTTCCCAGGC<br>CCGTAATCG |
| <i>SPDEF</i> | cg16527629            | Hs_CG01395541_02<br>_PM                         |                                                    | 58°C        |                              | GCCACGCAGGA                                              |

SUPPLEMENTARY Table S1. Primer sequences for *SPDEF*.

### ***Gene expression data***

#### Quality control (QC)

Total RNA was extracted from whole blood cells collected at the age of 14 using the PAXgene Blood RNA Kit (QIAGEN Inc., Valencia, CA). Following quality control of the total RNA extracted, labelled complementary RNA (cRNA) was generated using the Illumina® TotalPrep™ RNA Amplification kit (Applied Biosystems/Ambion, Austin, TX). Complementary RNA was purified and quantified using a Qubit® 2.0 Fluorometer (Invitrogen, Paisly, UK). The size distributions of cRNA were determined through Bioanalyzer (Agilent Technologies, Santa Clara, CA) using the Eukaryotic mRNA Assay with smear analysis. Gene expression profiling was performed using Illumina HumanHT-12 v4 Expression BeadChips (Illumina Inc., San Diego, CA).

#### Pre-processing

Expression data was normalized using the loess method (5) and log-transformed to correct for systematic effects arising from variations in the extraction and hybridisation process. Outliers were also screened for using R.

### ***Methylation data processing***

#### Illumina 450K microarray quality control (QC)

The qcReport function in the Bioconductor minfi package was used to identify failed samples with abnormal beta distribution, bisulfite conversion, probe extension, or hybridization, etc. Gender information was predicted for each sample based on methylation data using the getSex function in the minfi package, and one sample with gender discrepancy was removed. In order to evaluate potential batch effects, principal component analysis (PCA) was performed and first 4 PCs were evaluated against experimental batches, imaging centers, arrays and plates. We observed that the first PC was significantly associated with experimental batches and, thus, was adjusted in the following DMR analysis.

#### Differential cell counts estimation

Cell counts for the 6 major cell types in blood (Granulocytes, B cells, CD4+ T cells, CD8+ T cells, monocytes and NK cells) for each individual were estimated using the estimateCellCounts function in minfi(6), which gives sample-specific estimates of cell proportions based on reference information on cell-specific methylation signatures(7).

#### Methylation acquisition waves

Methylation data was processed in two waves, and while both waves were quantile normalized together, the acquisition wave information was still found to be the primary resource underlying the structure of methylation data, and therefore analyses involving both waves of methylation data were always corrected for the effects of acquisition wave.

## Phenotype-associated DMRs identification

We performed our differentially methylation region analysis using the bump hunter package in R (8,9) with adjustment for gender, experimental batches (recruitment centre and acquisition wave) and the first two principle components of estimated differential cell counts. Regions that have a family-wise error rate (FWER) less than 0.05 with 1000 resamples and contain at least 2 probes were identified as phenotype-associated differentially methylated regions.

## Methylation-Expression quantitative trait loci (methyl-eQTL) analyses

Methyl-eQTL analysis was performed on 34,833 gene expression probes and *SPDEF* methylation data generated on the Infinium HumanMethylation450 BeadChip. We ran a linear model adjusted for gender, recruitment site and genotype. DAVID was used to determine enrichment of biological processes and disease classes in the gene list generated from the methyl-eQTL analysis with  $p < 0.01$ . Enrichment for specific biological functions and disease classes was determined using a modified Fisher's test at a significance level of  $p < 0.05$ . A p-value that is equal or smaller than 0.05 to be considered strongly enriched in the annotation categories (10).

## Blood-brain Methylation

The Blood Brain DNA Methylation Comparison Tool was used to investigate the correlation between DNA methylation in the blood and in four brain regions (prefrontal cortex, entorhinal cortex, superior temporal gyrus and cerebellum), using matched samples obtained from 71–75 individuals who were assessed using the Infinium HumanMethylation450 BeadChip. Pearson's correlation coefficients obtaining a P-value  $\leq 0.05$  were considered statistically significant.

## ***Causal network analysis between stress, methylation and lifetime binge drinking***

To infer causal flow between frequency of negative stressful life events, methylation and lifetime binge drinking, the Network Edge Orienting (NEO) multi-edge simulation was conducted in R (11). An absolute correlation threshold of 0.01 was used to determine dependent pairs and allow for multi-edge Local SEM-based Edge Orienting (LEO) scores to be calculated.

### Neuroimaging data

#### ***MRI pre-processing***

T1 images were segmented into grey matter and white matter by using the Computational Anatomy Toolbox (CAT) 12 toolbox (<http://dbm.neuro.uni-jena.de/cat/>). These segmented tissues were then normalized to the age 14 TPM from TOM8 by using an affine transformation (12). The realigned tissues were input into DARTEL software to create the customized 14-year-old DARTEL templates (13). After which CAT12 was used to normalize the segmented grey matter, estimate the modulated voxel-wise grey matter volume and estimate the corresponding total intra cranial volume for each subject. Finally, we applied the Brainnetome atlas to the normalized grey matter data to generate the volume of each brain region (14). Since regions in the subcortical nuclei are small, the subregions of the amygdala, hippocampus, basal ganglia and thalamus were merged respectively.

### Results

#### ***Associations between negative stressful negative life events frequencies and substance use***

Gender was controlled for in all analyses because ANOVA showed that frequency of negative stressful life events in the last year was significantly ( $r^2=0.007$ ,  $p=0.004$ ) higher in girls ( $2.91\pm 1.86$ ) compared to boys ( $2.68\pm 1.68$ ).

### ***Bump hunting analyses on the frequency of negative stressful life events***

Bump hunting analysis identified a statistically significant ( $p$  (family-wise error corrected) = 0.021, bump hunter's regression coefficient = -0.07) covering exons 15 and 16 in the HOOK2 as shown in Figure S1.

The differentially methylated region located within the HOOK2 gene harboured 4 CpG sites, of which 2 contained SNPs that were located at the probe binding site (cg04657146 and cg11738485, rs897804 and rs35337531 respectively). Such SNPs could result in a false DNA methylation signal due to hybridization of the wrong probe or no/minimal extension at the target CpG site. As such methylation data from the HOOK2 gene was considered to be unreliable and we decided to focus our analyses on SPDEF.

### ***Technical Validation – Pyrosequencing***

A total of 94 individuals were randomly selected for pyrosequencing, while representing the genotype frequencies of rs2233632 and rs223361. There was a high correlation in the methylation data obtained with the pyrosequencing and the Illumina450K chip for both CpG sites in SPDEF, cg01395541 and cg16527629 ( $r=0.85$ ,  $p=2.21 \times 10^{-37}$  and  $r=0.82$  and  $p=6.77 \times 10^{-24}$ ,  $df=93$ , respectively).

The correlations between the genotypes at rs2233631 and rs2233632 with the methylation levels obtained from pyrosequencing were also significant (for cg01395541:  $r=-0.932$ ,  $p=2.39 \times 10^{-42}$ ,  $df=93$ ; for cg16527629:  $r=-0.81$ ,  $p=1.45 \times 10^{-22}$ ,  $df=93$ ). The mean level of methylation assessed with pyrosequencing for rs2233632 and rs2233631 are shown in the table below:

Table S2

| SNP | G homozygotes | Heterozygotes | A homozygotes |
|-----|---------------|---------------|---------------|
|-----|---------------|---------------|---------------|



|           |                                   |                                   |                                   |
|-----------|-----------------------------------|-----------------------------------|-----------------------------------|
| rs2233632 | M = 0.786; SD = 0.011<br>(n = 11) | M = 0.478; SD = 0.022<br>(n = 38) | M = 0.100; SD = 0.010<br>(n = 44) |
| rs2233631 | M = 0.822; SD = 0.019<br>(n = 11) | M = 0.834; SD = 0.025<br>(n = 38) | M = 0.286; SD = 0.048<br>(n = 44) |

### ***Causal Analysis - NEO***

Using a Network Edge Orienting (NEO) analysis, we found that genotype causes methylation and methylation causes binge drinking, and there is a high probability that stress causes binge drinking (see Supplementary Figure S2). This suggests independent causal relationships of frequency of negative stressful like events and cg01395541 methylation on binge drinking.

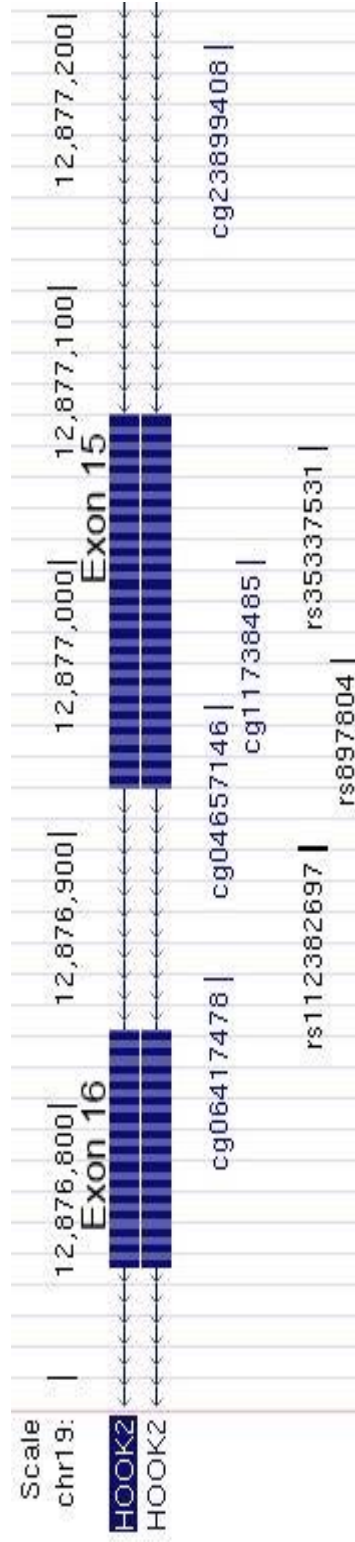

Figure S1: SNPs rs897804 and rs 35337531 within the differentially methylated region in HOOK2. Derived from Santa Cruz genome browser, build GRCh37/hg19.

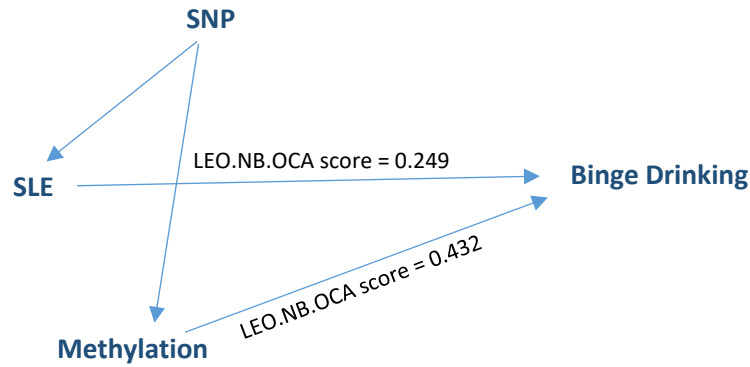

Figure S2: Network Edge Orienting. Multi-edge simulation between frequency of negative stressful life events, cg01395541 methylation and lifetime binge drinking.

### *Methylation-eQTL Analyses*

SUPPLEMENTARY Table S2. Genes associated with methylation levels at cg01395541 for SNP genotypes GG and GA.

| gene    | Symbol       | Definition                                                                                                           | beta     | t-stat   | p-value     |
|---------|--------------|----------------------------------------------------------------------------------------------------------------------|----------|----------|-------------|
| 1743987 | TRPM2        | Homo sapiens transient receptor potential cation channel, subfamily M, member 2 (TRPM2), transcript variant S, mRNA. | 1.649668 | 4.017731 | 7.65341E-05 |
| 1812995 | CTSL1        | Homo sapiens cathepsin L1 (CTSL1), transcript variant 1, mRNA.                                                       | -2.8885  | -3.99542 | 8.36576E-05 |
| 1680273 | MYOCD        | Homo sapiens myocardin (MYOCD), mRNA.                                                                                | -1.60027 | -3.95384 | 9.86532E-05 |
| 3201163 | LOC100131311 | PREDICTED: Homo sapiens hypothetical LOC100131311 (LOC100131311), mRNA.                                              | -2.27214 | -3.94507 | 0.000102126 |
| 2370365 | RFC4         | Homo sapiens replication factor C (activator 1) 4, 37kDa (RFC4), transcript variant 1, mRNA.                         | -2.07146 | -3.69597 | 0.000265957 |
| 1749376 | TMEM201      | Homo sapiens transmembrane protein 201 (TMEM201), mRNA.                                                              | 1.771161 | 3.676228 | 0.000286312 |
| 1665748 | DCC          | Homo sapiens deleted in colorectal carcinoma (DCC), mRNA.                                                            | 1.477759 | 3.641921 | 0.000325212 |
| 3239298 | OTUD7B       | Homo sapiens OTU domain containing 7B (OTUD7B), mRNA.                                                                | 2.035493 | 3.603685 | 0.000374408 |
| 1709346 | CLTB         | Homo sapiens clathrin, light chain (Lcb) (CLTB), transcript variant 2, mRNA.                                         | -1.70291 | -3.58986 | 0.000393852 |
| 1749466 | VAT1L        | Homo sapiens vesicle amine transport protein 1 homolog (T. californica)-like (VAT1L), mRNA.                          | 1.554227 | 3.505792 | 0.000534119 |

|         |           |                                                                                                              |          |          |             |
|---------|-----------|--------------------------------------------------------------------------------------------------------------|----------|----------|-------------|
| 1740917 | SCNN1B    | Homo sapiens sodium channel, nonvoltage-gated 1, beta (SCNN1B), mRNA.                                        | 2.307899 | 3.478083 | 0.000589794 |
| 2413622 | RFX4      | Homo sapiens regulatory factor X, 4 (influences HLA class II expression) (RFX4), transcript variant 2, mRNA. | 1.795565 | 3.446956 | 0.000658793 |
| 2158713 | IL1F9     | Homo sapiens interleukin 1 family, member 9 (IL1F9), mRNA.                                                   | 1.844837 | 3.426813 | 0.000707393 |
| 1797526 | LOC400120 | Homo sapiens hypothetical LOC400120 (LOC400120), mRNA.                                                       | 1.735356 | 3.415807 | 0.000735344 |
| 1675616 | C12orf54  | Homo sapiens chromosome 12 open reading frame 54 (C12orf54), mRNA.                                           | 1.653544 | 3.399992 | 0.000777317 |
| 2285952 | PCDH11X   | Homo sapiens protocadherin 11 X-linked (PCDH11X), transcript variant b, mRNA.                                | -1.46559 | -3.38984 | 0.00080543  |
| 1718971 | TTC7B     | Homo sapiens tetratricopeptide repeat domain 7B (TTC7B), mRNA.                                               | 2.862728 | 3.386103 | 0.000816012 |
| 1794505 | SHFM1     | Homo sapiens split hand/foot malformation (ectrodactyly) type 1 (SHFM1), mRNA.                               | -1.70207 | -3.37399 | 0.00085123  |
| 3250201 | CNBP      | Homo sapiens CCHC-type zinc finger, nucleic acid binding protein (CNBP), transcript variant 4, mRNA.         | 1.65587  | 3.35909  | 0.000896469 |
| 1697000 | KIAA0258  | PREDICTED: Homo sapiens KIAA0258, transcript variant 3 (KIAA0258), mRNA.                                     | 1.446655 | 3.354938 | 0.000909472 |
| 1730363 | STAU1     | Homo sapiens staufen, RNA binding protein, homolog 1 (Drosophila) (STAU1), transcript variant T3, mRNA.      | -1.45741 | -3.33543 | 0.000972962 |
| 1889229 |           | BX107795 Soares breast 3NbHBst Homo sapiens cDNA clone IMAGp998G11259, mRNA sequence                         | -1.68721 | -3.33007 | 0.000991094 |
| 1689814 | DUSP13    | Homo sapiens dual specificity phosphatase 13 (DUSP13), transcript variant 6, mRNA.                           | 1.446816 | 3.329048 | 0.000994602 |
| 1803408 | KRT18     | Homo sapiens keratin 18 (KRT18), transcript variant 1, mRNA.                                                 | -1.53672 | -3.2849  | 0.001157084 |
| 3310995 | MIR578    | Homo sapiens microRNA 578 (MIR578), microRNA.                                                                | -1.78181 | -3.25469 | 0.00128214  |
| 1908872 |           | ny42b04.s1 NCI_CGAP_Pr12 Homo sapiens cDNA clone                                                             | -1.45798 | -3.25042 | 0.001300794 |

|         |              |                                                                                                                                                                     |          |          |             |
|---------|--------------|---------------------------------------------------------------------------------------------------------------------------------------------------------------------|----------|----------|-------------|
|         |              | IMAGE:1274383, mRNA sequence                                                                                                                                        |          |          |             |
| 1753766 | LOC388743    | PREDICTED: Homo sapiens similar to calpain 8, transcript variant 5 (LOC388743), mRNA.                                                                               | -1.5287  | -3.24853 | 0.001309119 |
| 1775965 | PPP4R4       | Homo sapiens protein phosphatase 4, regulatory subunit 4 (PPP4R4), transcript variant 1, mRNA.                                                                      | -1.62718 | -3.24287 | 0.001334395 |
| 1770537 | NGFRAP1      | Homo sapiens nerve growth factor receptor (TNFRSF16) associated protein 1 (NGFRAP1), transcript variant 3, mRNA.                                                    | 1.613563 | 3.226811 | 0.001408552 |
| 3201840 | LOC100131818 | PREDICTED: Homo sapiens similar to hCG1644435 (LOC100131818), mRNA.                                                                                                 | 1.478965 | 3.226365 | 0.001410663 |
| 3245255 | LOC100133629 | PREDICTED: Homo sapiens hypothetical protein LOC100133629 (LOC100133629), mRNA.                                                                                     | -1.61884 | -3.21652 | 0.001458057 |
| 1806059 | SPRR2B       | Homo sapiens small proline-rich protein 2B (SPRR2B), mRNA.                                                                                                          | 1.278203 | 3.215741 | 0.001461882 |
| 3239588 | LOC100133178 | PREDICTED: Homo sapiens hypothetical protein LOC100133178 (LOC100133178), mRNA.                                                                                     | -1.36111 | -3.21054 | 0.001487554 |
| 1663081 | LOC440925    | Homo sapiens hypothetical gene supported by AK123485 (LOC440925), mRNA.                                                                                             | -1.27277 | -3.20524 | 0.001514195 |
| 1771537 | LOC643920    | PREDICTED: Homo sapiens region containing similar to Williams Beuren syndrome chromosome region 19; hypothetical LOC441257, transcript variant 2 (LOC643920), mRNA. | -1.70093 | -3.18676 | 0.001610482 |
| 2293631 | MGAT5B       | Homo sapiens mannosyl (alpha-1,6-)-glycoprotein beta-1,6-N-acetyl-glucosaminyltransferase, isozyme B (MGAT5B), transcript variant 2, mRNA.                          | -1.45193 | -3.18603 | 0.001614402 |
| 1654496 | LOC646168    | PREDICTED: Homo sapiens hypothetical protein LOC646167, transcript variant 1 (LOC646168), mRNA.                                                                     | 1.470276 | 3.184319 | 0.001623623 |
| 1791605 | LOC729786    | PREDICTED: Homo sapiens similar to golgi autoantigen, golgin subfamily a, 8A (LOC729786), mRNA.                                                                     | -1.61452 | -3.16236 | 0.001746344 |
| 1810532 | CAV3         | Homo sapiens caveolin 3 (CAV3), transcript variant 1, mRNA.                                                                                                         | -2.09529 | -3.15164 | 0.001809273 |

|         |              |                                                                                                                                             |          |          |             |
|---------|--------------|---------------------------------------------------------------------------------------------------------------------------------------------|----------|----------|-------------|
| 3241296 | LOC100132515 | PREDICTED: Homo sapiens similar to hCG2045429 (LOC100132515), mRNA.                                                                         | -1.65081 | -3.1494  | 0.001822711 |
| 1714445 | SLC6A9       | Homo sapiens solute carrier family 6 (neurotransmitter transporter, glycine), member 9 (SLC6A9), transcript variant 3, mRNA.                | 1.900563 | 3.140609 | 0.001876256 |
| 3206101 | LOC728026    | PREDICTED: Homo sapiens hypothetical LOC728026 (LOC728026), mRNA.                                                                           | -1.49599 | -3.13654 | 0.001901527 |
| 1656826 | SH3RF1       | Homo sapiens SH3 domain containing ring finger 1 (SH3RF1), mRNA.                                                                            | 1.314614 | 3.130085 | 0.001942279 |
| 1772506 | ATP5I        | Homo sapiens ATP synthase, H+ transporting, mitochondrial F0 complex, subunit E (ATP5I), nuclear gene encoding mitochondrial protein, mRNA. | -2.84818 | -3.12686 | 0.00196291  |
| 2058070 | NEDD8        | Homo sapiens neural precursor cell expressed, developmentally down-regulated 8 (NEDD8), mRNA.                                               | -1.77858 | -3.11952 | 0.002010717 |
| 3218138 | LOC283523    | PREDICTED: Homo sapiens similar to telomeric repeat binding factor (NIMA-interacting) 1 (LOC283523), mRNA.                                  | -1.53509 | -3.11811 | 0.002020021 |
| 1793549 | PTPN4        | Homo sapiens protein tyrosine phosphatase, non-receptor type 4 (megakaryocyte) (PTPN4), mRNA.                                               | -2.94949 | -3.11741 | 0.002024626 |
| 2054481 | PTCHD3       | Homo sapiens patched domain containing 3 (PTCHD3), mRNA.                                                                                    | 1.270555 | 3.096163 | 0.00216998  |
| 1710229 | ARRDC2       | Homo sapiens arrestin domain containing 2 (ARRDC2), transcript variant 2, mRNA.                                                             | 2.36407  | 3.093165 | 0.002191243 |
| 1663099 | UBE2B        | Homo sapiens ubiquitin-conjugating enzyme E2B (RAD6 homolog) (UBE2B), mRNA.                                                                 | 1.695    | 3.083293 | 0.00226262  |
| 1748052 | LOC643116    | PREDICTED: Homo sapiens hypothetical protein LOC643116 (LOC643116), mRNA.                                                                   | -1.64657 | -3.08282 | 0.002266064 |
| 1769369 | ELAVL2       | Homo sapiens ELAV (embryonic lethal, abnormal vision, Drosophila)-like 2 (Hu antigen B) (ELAVL2), mRNA.                                     | -1.21417 | -3.07988 | 0.002287805 |
| 3307967 | DEFB117      | PREDICTED: Homo sapiens defensin, beta 117 (DEFB117), mRNA.                                                                                 | -1.47464 | -3.07971 | 0.002289032 |
| 1814333 | SERPINI1     | Homo sapiens serpin peptidase inhibitor, clade I (neuroserpin), member 1 (SERPINI1), mRNA.                                                  | -1.4518  | -3.07594 | 0.002317204 |

|         |           |                                                                                                           |          |          |             |
|---------|-----------|-----------------------------------------------------------------------------------------------------------|----------|----------|-------------|
| 2275199 | OPRM1     | Homo sapiens opioid receptor, mu 1 (OPRM1), transcript variant MOR-1, mRNA.                               | 1.431015 | 3.071248 | 0.002352623 |
| 1757757 | TM6SF2    | Homo sapiens transmembrane 6 superfamily member 2 (TM6SF2), mRNA.                                         | 1.301902 | 3.070578 | 0.002357723 |
| 2225061 | TRIM71    | Homo sapiens tripartite motif-containing 71 (TRIM71), mRNA.                                               | -1.40463 | -3.06805 | 0.002377028 |
| 1794056 | DNAJB5    | Homo sapiens DnaJ (Hsp40) homolog, subfamily B, member 5 (DNAJB5), mRNA.                                  | 1.353515 | 3.063003 | 0.002416111 |
| 2068274 | CLEC9A    | Homo sapiens C-type lectin domain family 9, member A (CLEC9A), mRNA.                                      | -1.57298 | -3.06279 | 0.002417807 |
| 3293097 | LOC645715 | PREDICTED: Homo sapiens misc_RNA (LOC645715), miscRNA.                                                    | -1.49137 | -3.04399 | 0.002568595 |
| 2296697 | MAP3K3    | Homo sapiens mitogen-activated protein kinase kinase kinase 3 (MAP3K3), transcript variant 1, mRNA.       | 1.942959 | 3.042091 | 0.002584285 |
| 1759766 | CTXN1     | Homo sapiens cortexin 1 (CTXN1), mRNA.                                                                    | 1.894189 | 3.037794 | 0.002620151 |
| 1671010 | ZNF267    | Homo sapiens zinc finger protein 267 (ZNF267), transcript variant 498723, mRNA.                           | 1.661559 | 3.031834 | 0.002670646 |
| 1737947 | LSM5      | Homo sapiens LSM5 homolog, U6 small nuclear RNA associated ( <i>S. cerevisiae</i> ) (LSM5), mRNA.         | -3.91882 | -3.02541 | 0.002726077 |
| 1779324 | GZMA      | Homo sapiens granzyme A (granzyme 1, cytotoxic T-lymphocyte-associated serine esterase 3) (GZMA), mRNA.   | -6.46377 | -3.02456 | 0.002733495 |
| 1766984 | EIF5AL1   | Homo sapiens eukaryotic translation initiation factor 5A-like 1 (EIF5AL1), mRNA.                          | -1.51781 | -3.02291 | 0.002747923 |
| 1708983 | CASC1     | Homo sapiens cancer susceptibility candidate 1 (CASC1), transcript variant 3, mRNA.                       | 1.890691 | 3.005372 | 0.002905847 |
| 1723632 | PIGC      | Homo sapiens phosphatidylinositol glycan anchor biosynthesis, class C (PIGC), transcript variant 1, mRNA. | -1.64098 | -3.00365 | 0.00292176  |
| 1738268 | IHPK3     | Homo sapiens inositol hexaphosphate kinase 3 (IHPK3), mRNA.                                               | 1.489852 | 2.988393 | 0.003066616 |
| 2175715 | KIR2DS3   | Homo sapiens killer cell immunoglobulin-like receptor, two                                                | -1.89504 | -2.98832 | 0.00306736  |

|         |           |                                                                                         |          |          |             |
|---------|-----------|-----------------------------------------------------------------------------------------|----------|----------|-------------|
|         |           | domains, short cytoplasmic tail, 3 (KIR2DS3), mRNA.                                     |          |          |             |
| 1704252 | LOC652439 | PREDICTED: Homo sapiens hypothetical protein LOC652439 (LOC652439), mRNA.               | 1.468327 | 2.985085 | 0.003098874 |
| 3243471 | CNPY2     | Homo sapiens canopy 2 homolog (zebrafish) (CNPY2), mRNA.                                | -2.417   | -2.98103 | 0.003138816 |
| 2342630 | LPHN1     | Homo sapiens latrophilin 1 (LPHN1), transcript variant 2, mRNA.                         | 1.787771 | 2.976428 | 0.00318477  |
| 1780455 | ZNF654    | PREDICTED: Homo sapiens zinc finger protein 654 (ZNF654), mRNA.                         | -1.48571 | -2.97466 | 0.003202558 |
| 1689086 | CTSC      | Homo sapiens cathepsin C (CTSC), transcript variant 2, mRNA.                            | -1.46796 | -2.96389 | 0.003313043 |
| 2078995 | CSRNP3    | Homo sapiens cysteine-serine-rich nuclear protein 3 (CSRNP3), mRNA.                     | -1.22272 | -2.96354 | 0.00331664  |
| 3308395 | MIR1250   | Homo sapiens microRNA 1250 (MIR1250), microRNA.                                         | -1.3591  | -2.96262 | 0.003326328 |
| 1763137 | INVS      | Homo sapiens inversin (INVS), transcript variant 1, mRNA.                               | 1.332596 | 2.958722 | 0.003367283 |
| 1763657 | CXXC4     | Homo sapiens CXXC finger 4 (CXXC4), mRNA.                                               | 1.247439 | 2.94838  | 0.003478268 |
| 2343010 | BOLA3     | Homo sapiens bolA homolog 3 (E. coli) (BOLA3), transcript variant 1, mRNA.              | -2.36832 | -2.94742 | 0.003488779 |
| 1862737 |           | AGENCOURT_8911223<br>NIH_MGC_141 Homo sapiens cDNA clone IMAGE:6386615 5, mRNA sequence | 1.212896 | 2.925245 | 0.003738755 |
| 3309419 | MIR1281   | Homo sapiens microRNA 1281 (MIR1281), microRNA.                                         | 1.867459 | 2.921975 | 0.003776987 |
| 1679464 | BNC1      | Homo sapiens basonuclin 1 (BNC1), mRNA.                                                 | -1.43209 | -2.92001 | 0.003800169 |
| 3236316 | LOC729121 | Homo sapiens hypothetical LOC729121 (LOC729121), non-coding RNA.                        | 1.162075 | 2.919551 | 0.003805552 |
| 1737283 | MGC39900  | Homo sapiens hypothetical protein MGC39900 (MGC39900), mRNA.                            | -1.3459  | -2.91708 | 0.003834818 |
| 1724265 | PART1     | PREDICTED: Homo sapiens prostate androgen-regulated transcript 1 (PART1), misc RNA.     | -1.43012 | -2.91613 | 0.003846246 |
| 1786759 | C11orf10  | Homo sapiens chromosome 11 open reading frame 10 (C11orf10), mRNA.                      | -2.59847 | -2.91551 | 0.00385366  |
| 1661998 | METTL6    | Homo sapiens methyltransferase like 6 (METTL6), mRNA.                                   | -1.78642 | -2.91048 | 0.003914221 |



|         |           |                                                                                                                  |          |          |             |
|---------|-----------|------------------------------------------------------------------------------------------------------------------|----------|----------|-------------|
| 2047618 | KCNE1     | Homo sapiens potassium voltage-gated channel, Isk-related family, member 1 (KCNE1), mRNA.                        | 1.446345 | 2.905577 | 0.003974113 |
| 1840742 |           | zw78c04.r1 Soares_testis_NHT Homo sapiens cDNA clone IMAGE:782310 5, mRNA sequence                               | 1.287105 | 2.901487 | 0.00402472  |
| 2209045 | POU3F2    | Homo sapiens POU class 3 homeobox 2 (POU3F2), mRNA.                                                              | -1.49591 | -2.89476 | 0.004109202 |
| 1786697 | TRIM9     | Homo sapiens tripartite motif-containing 9 (TRIM9), transcript variant 2, mRNA.                                  | 1.114604 | 2.892491 | 0.004138115 |
| 2112811 | RPL36A    | Homo sapiens ribosomal protein L36a (RPL36A), mRNA.                                                              | -2.03244 | -2.89232 | 0.004140332 |
| 1674659 | OR56B4    | Homo sapiens olfactory receptor, family 56, subfamily B, member 4 (OR56B4), mRNA.                                | 1.165712 | 2.889227 | 0.004179969 |
| 1671489 | PC        | Homo sapiens pyruvate carboxylase (PC), nuclear gene encoding mitochondrial protein, transcript variant A, mRNA. | 1.125687 | 2.889044 | 0.004182327 |
| 1832155 |           | Homo sapiens cDNA FLJ37425 fis, clone BRAWH2001530                                                               | -1.45124 | -2.88869 | 0.00418689  |
| 2342579 | IL7R      | Homo sapiens interleukin 7 receptor (IL7R), mRNA.                                                                | 4.531305 | 2.885955 | 0.004222317 |
| 1751280 | LOC651905 | PREDICTED: Homo sapiens hypothetical protein LOC651905 (LOC651905), mRNA.                                        | 1.540105 | 2.884363 | 0.004243061 |
| 1806548 | LOC647855 | PREDICTED: Homo sapiens hypothetical LOC647855 (LOC647855), mRNA.                                                | 1.302928 | 2.883789 | 0.004250566 |
| 3307121 | FLJ46836  | PREDICTED: Homo sapiens FLJ46836 protein (FLJ46836), miscRNA.                                                    | 1.262742 | 2.876217 | 0.004350681 |
| 1674817 | C1orf115  | Homo sapiens chromosome 1 open reading frame 115 (C1orf115), mRNA.                                               | 1.793624 | 2.873504 | 0.004387074 |
| 3250345 | LOC283788 | PREDICTED: Homo sapiens hypothetical protein LOC283788 (LOC283788), mRNA.                                        | -2.66489 | -2.87341 | 0.004388329 |
| 2190486 | GGT3P     | Homo sapiens gamma-glutamyltransferase 3 pseudogene (GGT3P), non-coding RNA.                                     | 1.443165 | 2.871742 | 0.004410846 |
| 1786658 | BOLA3     | Homo sapiens bolA homolog 3 (E. coli) (BOLA3), transcript variant 2, mRNA.                                       | -2.39146 | -2.87091 | 0.004422124 |
| 1669611 | LOC645757 | PREDICTED: Homo sapiens hypothetical LOC645757 (LOC645757), mRNA.                                                | -1.49766 | -2.87048 | 0.004427954 |

|         |           |                                                                                                                              |          |          |             |
|---------|-----------|------------------------------------------------------------------------------------------------------------------------------|----------|----------|-------------|
| 1730937 | SLC39A13  | Homo sapiens solute carrier family 39 (zinc transporter), member 13 (SLC39A13), mRNA.                                        | 1.379143 | 2.870024 | 0.004434157 |
| 2356331 | PCDHGA10  | Homo sapiens protocadherin gamma subfamily A, 10 (PCDHGA10), transcript variant 2, mRNA.                                     | 1.372113 | 2.867623 | 0.004466908 |
| 3309001 | MIR1-2    | Homo sapiens microRNA 1-2 (MIR1-2), microRNA.                                                                                | 1.414402 | 2.866687 | 0.004479728 |
| 1655783 | ATP1B3    | PREDICTED: Homo sapiens ATPase, Na+/K+ transporting, beta 3 polypeptide, transcript variant 1 (ATP1B3), mRNA.                | 1.495792 | 2.863212 | 0.004527644 |
| 1662061 | LOC645635 | PREDICTED: Homo sapiens hypothetical protein LOC645635 (LOC645635), mRNA.                                                    | 1.423356 | 2.86168  | 0.004548926 |
| 1761945 | FGFBP2    | Homo sapiens fibroblast growth factor binding protein 2 (FGFBP2), mRNA.                                                      | -5.56396 | -2.85961 | 0.004577818 |
| 1652287 | NOG       | Homo sapiens noggin (NOG), mRNA.                                                                                             | 1.324347 | 2.853581 | 0.00466291  |
| 1800642 | RELN      | Homo sapiens reelin (RELN), transcript variant 2, mRNA.                                                                      | 1.159319 | 2.852704 | 0.004675409 |
| 2317348 | APTX      | Homo sapiens aprataxin (APTX), transcript variant 2, mRNA.                                                                   | -1.2606  | -2.85191 | 0.004686739 |
| 1814952 | FLCN      | Homo sapiens folliculin (FLCN), transcript variant 2, mRNA.                                                                  | -1.38727 | -2.8517  | 0.004689727 |
| 3279987 | LOC442232 | PREDICTED: Homo sapiens misc_RNA (LOC442232), miscRNA.                                                                       | -1.54352 | -2.85026 | 0.004710365 |
| 2073184 | S1PR5     | Homo sapiens sphingosine-1-phosphate receptor 5 (S1PR5), mRNA.                                                               | -4.17417 | -2.84695 | 0.004758144 |
| 2278518 | NFATC2IP  | Homo sapiens nuclear factor of activated T-cells, cytoplasmic, calcineurin-dependent 2 interacting protein (NFATC2IP), mRNA. | -1.31304 | -2.84525 | 0.00478282  |
| 3278608 | LOC139431 | PREDICTED: Homo sapiens similar to hCG1799751 (LOC139431), mRNA.                                                             | -1.30437 | -2.84275 | 0.004819418 |
| 1680794 | LOC643570 | PREDICTED: Homo sapiens hypothetical protein LOC643570 (LOC643570), mRNA.                                                    | 1.509165 | 2.840768 | 0.004848552 |
| 1669350 | LOC729197 | PREDICTED: Homo sapiens similar to Dynamin-1 (D100) (Dynamin, brain) (B-dynamin) (LOC729197), mRNA.                          | -1.39655 | -2.83785 | 0.00489176  |

|         |              |                                                                                                                               |          |          |             |
|---------|--------------|-------------------------------------------------------------------------------------------------------------------------------|----------|----------|-------------|
| 3309694 | SNORD69      | Homo sapiens small nucleolar RNA, C/D box 69 (SNORD69), small nucleolar RNA.                                                  | -1.47855 | -2.83715 | 0.004902209 |
| 1754077 | EYA2         | Homo sapiens eyes absent homolog 2 (Drosophila) (EYA2), transcript variant 2, mRNA.                                           | 1.092626 | 2.833994 | 0.004949401 |
| 1710408 | LGR4         | Homo sapiens leucine-rich repeat-containing G protein-coupled receptor 4 (LGR4), mRNA.                                        | -1.15642 | -2.82906 | 0.005024026 |
| 3308728 | MIR635       | Homo sapiens microRNA 635 (MIR635), microRNA.                                                                                 | 1.921407 | 2.82852  | 0.005032284 |
| 2094631 | TRIM60       | Homo sapiens tripartite motif-containing 60 (TRIM60), mRNA.                                                                   | 1.214425 | 2.827831 | 0.0050428   |
| 3256004 | LOC100130003 | PREDICTED: Homo sapiens misc_RNA (LOC100130003), miscRNA.                                                                     | -4.38637 | -2.82541 | 0.005079899 |
| 2259633 | MLL5         | Homo sapiens myeloid/lymphoid or mixed-lineage leukemia 5 (trithorax homolog, Drosophila) (MLL5), transcript variant 1, mRNA. | 2.649472 | 2.824545 | 0.005093252 |
| 2285585 | C13orf23     | Homo sapiens chromosome 13 open reading frame 23 (C13orf23), transcript variant 1, mRNA.                                      | 1.483559 | 2.823231 | 0.005113548 |
| 1675057 | DRD2         | Homo sapiens dopamine receptor D2 (DRD2), transcript variant 2, mRNA.                                                         | -1.34496 | -2.82295 | 0.005117871 |
| 1656715 | THSD7A       | Homo sapiens thrombospondin, type I, domain containing 7A (THSD7A), mRNA.                                                     | 1.277524 | 2.819703 | 0.005168429 |
| 1803671 | SSX1         | PREDICTED: Homo sapiens synovial sarcoma, X breakpoint 1 (SSX1), mRNA.                                                        | -1.56593 | -2.81657 | 0.005217596 |
| 1739641 | MTMR3        | Homo sapiens myotubularin related protein 3 (MTMR3), transcript variant 3, mRNA.                                              | 2.698469 | 2.810433 | 0.005315181 |
| 1797988 | KLRD1        | Homo sapiens killer cell lectin-like receptor subfamily D, member 1 (KLRD1), transcript variant 1, mRNA.                      | -4.0996  | -2.80571 | 0.005391443 |
| 3260618 | LOC100128086 | PREDICTED: Homo sapiens misc_RNA (LOC100128086), miscRNA.                                                                     | -1.70663 | -2.80547 | 0.005395334 |
| 1821997 |              | wn53g02.x1 NCI_CGAP_Lu19 Homo sapiens cDNA clone IMAGE:2449202 3, mRNA sequence                                               | 1.423032 | 2.804304 | 0.005414277 |

|         |           |                                                                                                               |          |          |             |
|---------|-----------|---------------------------------------------------------------------------------------------------------------|----------|----------|-------------|
| 1771822 | ARL6      | Homo sapiens ADP-ribosylation factor-like 6 (ARL6), transcript variant 2, mRNA.                               | -1.22771 | -2.79281 | 0.005604655 |
| 2110281 | UFC1      | Homo sapiens ubiquitin-fold modifier conjugating enzyme 1 (UFC1), mRNA.                                       | -2.89756 | -2.79255 | 0.005609094 |
| 1709131 | LOC649422 | PREDICTED: Homo sapiens hypothetical protein LOC649422 (LOC649422), mRNA.                                     | 1.684834 | 2.789247 | 0.005664866 |
| 3242856 | BEND3     | Homo sapiens BEN domain containing 3 (BEND3), mRNA.                                                           | 1.663913 | 2.778183 | 0.00585567  |
| 1781182 | RAB43     | Homo sapiens RAB43, member RAS oncogene family (RAB43), mRNA.                                                 | 1.357762 | 2.767873 | 0.006038692 |
| 1672658 | OR6B2     | Homo sapiens olfactory receptor, family 6, subfamily B, member 2 (OR6B2), mRNA.                               | -1.09246 | -2.76784 | 0.006039244 |
| 1810712 | ARHGEF12  | Homo sapiens Rho guanine nucleotide exchange factor (GEF) 12 (ARHGEF12), mRNA.                                | -1.38938 | -2.76408 | 0.006107277 |
| 2108699 | IL2RA     | Homo sapiens interleukin 2 receptor, alpha (IL2RA), mRNA.                                                     | -1.3782  | -2.76374 | 0.006113578 |
| 1772092 | LOC152586 | PREDICTED: Homo sapiens similar to RIKEN cDNA 4933434I20 (LOC152586), mRNA.                                   | 1.816249 | 2.760334 | 0.006175796 |
| 2285141 | USP48     | Homo sapiens ubiquitin specific peptidase 48 (USP48), transcript variant 1, mRNA.                             | 2.3107   | 2.759562 | 0.006189994 |
| 1709322 | LOC651249 | PREDICTED: Homo sapiens similar to ribosomal protein L34 (LOC651249), mRNA.                                   | -1.75972 | -2.7595  | 0.006191148 |
| 2172547 | TRIM74    | Homo sapiens tripartite motif-containing 74 (TRIM74), mRNA.                                                   | 1.200444 | 2.757443 | 0.006229099 |
| 1784294 | CPA4      | Homo sapiens carboxypeptidase A4 (CPA4), mRNA.                                                                | -1.25153 | -2.7552  | 0.006270848 |
| 1734696 | FRG1      | Homo sapiens FSHD region gene 1 (FRG1), mRNA.                                                                 | -4.67111 | -2.75506 | 0.006273274 |
| 1660315 | SPN       | Homo sapiens sialophorin (SPN), transcript variant 2, mRNA.                                                   | 1.297858 | 2.753137 | 0.00630929  |
| 1694382 | LOC642608 | PREDICTED: Homo sapiens hypothetical protein LOC642608 (LOC642608), mRNA.                                     | -1.51161 | -2.74852 | 0.006396351 |
| 2097421 | MRPL51    | Homo sapiens mitochondrial ribosomal protein L51 (MRPL51), nuclear gene encoding mitochondrial protein, mRNA. | -4.57587 | -2.74641 | 0.006436342 |
| 2395856 | TMEM218   | Homo sapiens transmembrane protein 218 (TMEM218), mRNA.                                                       | -1.55753 | -2.74439 | 0.006475017 |

|         |              |                                                                                                                                                              |          |          |             |
|---------|--------------|--------------------------------------------------------------------------------------------------------------------------------------------------------------|----------|----------|-------------|
| 3240883 | SNORA11C     | Homo sapiens small nucleolar RNA, H/ACA box 11C (retrotransposed) (SNORA11C), small nucleolar RNA.                                                           | 1.470533 | 2.741103 | 0.006538362 |
| 2360202 | PPP2R2B      | Homo sapiens protein phosphatase 2 (formerly 2A), regulatory subunit B, beta isoform (PPP2R2B), transcript variant 4, mRNA.                                  | -1.31711 | -2.73667 | 0.006624621 |
| 2070102 | SLC5A2       | Homo sapiens solute carrier family 5 (sodium/glucose cotransporter), member 2 (SLC5A2), mRNA.                                                                | -1.14324 | -2.73443 | 0.006668688 |
| 3253850 | LOC100129250 | PREDICTED: Homo sapiens similar to hCG1811779 (LOC100129250), mRNA.                                                                                          | -1.61852 | -2.73077 | 0.006740961 |
| 1787140 | LOC644341    | PREDICTED: Homo sapiens hypothetical protein LOC644341 (LOC644341), mRNA.                                                                                    | -1.53952 | -2.73055 | 0.006745329 |
| 1661616 | FSHR         | Homo sapiens follicle stimulating hormone receptor (FSHR), transcript variant 1, mRNA.                                                                       | -1.29619 | -2.73032 | 0.006749888 |
| 1753773 | ANAPC11      | Homo sapiens anaphase promoting complex subunit 11 (ANAPC11), transcript variant 1, mRNA.                                                                    | 1.320119 | 2.723684 | 0.006883261 |
| 1790810 | HCN4         | Homo sapiens hyperpolarization activated cyclic nucleotide-gated potassium channel 4 (HCN4), mRNA.                                                           | 1.625887 | 2.723449 | 0.006888014 |
| 3181406 | DHX40P       | Homo sapiens DEAH (Asp-Glu-Ala-His) box polypeptide 40 pseudogene (DHX40P), non-coding RNA.                                                                  | -1.2487  | -2.72318 | 0.006893477 |
| 3235308 | LOC100133580 | PREDICTED: Homo sapiens hypothetical LOC100133580 (LOC100133580), mRNA.                                                                                      | -1.24005 | -2.72135 | 0.006930769 |
| 2367818 | CD40         | Homo sapiens CD40 molecule, TNF receptor superfamily member 5 (CD40), transcript variant 2, mRNA.                                                            | -1.34507 | -2.71755 | 0.007008669 |
| 1700888 | ENPP1        | Homo sapiens ectonucleotide pyrophosphatase/phosphodiesterase 1 (ENPP1), mRNA.                                                                               | 1.179718 | 2.717095 | 0.007017941 |
| 1665824 | C6orf218     | Homo sapiens chromosome 6 open reading frame 218 (C6orf218), mRNA.                                                                                           | 1.378763 | 2.714363 | 0.007074488 |
| 1808661 | TOMM5        | Homo sapiens translocase of outer mitochondrial membrane 5 homolog (yeast) (TOMM5), nuclear gene encoding mitochondrial protein, transcript variant 1, mRNA. | -3.0739  | -2.71288 | 0.007105338 |

|         |              |                                                                                                                                                         |          |          |             |
|---------|--------------|---------------------------------------------------------------------------------------------------------------------------------------------------------|----------|----------|-------------|
| 2183728 | INTU         | Homo sapiens intuned planar cell polarity effector homolog (Drosophila) (INTU), mRNA.                                                                   | -1.35139 | -2.71205 | 0.007122724 |
| 3310316 | MIR1324      | Homo sapiens microRNA 1324 (MIR1324), microRNA.                                                                                                         | -1.34197 | -2.71142 | 0.007135838 |
| 1696921 | LATS1        | Homo sapiens LATS, large tumor suppressor, homolog 1 (Drosophila) (LATS1), mRNA.                                                                        | -1.38315 | -2.70618 | 0.007246293 |
| 3242654 | LOC100134654 | PREDICTED: Homo sapiens hypothetical protein LOC100134654 (LOC100134654), mRNA.                                                                         | 1.377005 | 2.705514 | 0.00726046  |
| 1825182 |              | ym06b01.s1 Soares infant brain 1NIB Homo sapiens cDNA clone IMAGE:47119 3, mRNA sequence                                                                | -1.25607 | -2.70519 | 0.007267459 |
| 3181379 | LOC100130734 | PREDICTED: Homo sapiens hypothetical protein LOC100130734 (LOC100130734), mRNA.                                                                         | 1.394079 | 2.703789 | 0.007297223 |
| 2294086 | STMN1        | Homo sapiens stathmin 1 (STMN1), transcript variant 2, mRNA.                                                                                            | -0.97209 | -2.70342 | 0.00730515  |
| 1666967 | BRP44L       | Homo sapiens brain protein 44-like (BRP44L), mRNA.                                                                                                      | -1.61671 | -2.69955 | 0.007388358 |
| 1714424 | PTCD3        | Homo sapiens Pentatricopeptide repeat domain 3 (PTCD3), mRNA.                                                                                           | 1.393067 | 2.699436 | 0.007390744 |
| 1658477 | C12orf64     | Homo sapiens chromosome 12 open reading frame 64 (C12orf64), mRNA.                                                                                      | 1.286899 | 2.698629 | 0.007408207 |
| 1676749 | C3orf15      | Homo sapiens chromosome 3 open reading frame 15 (C3orf15), mRNA.                                                                                        | -1.30725 | -2.69443 | 0.00749953  |
| 2120965 | NPAT         | Homo sapiens nuclear protein, ataxia-telangiectasia locus (NPAT), mRNA.                                                                                 | 2.458876 | 2.692517 | 0.007541624 |
| 1726603 | ATP5I        | Homo sapiens ATP synthase, H <sup>+</sup> transporting, mitochondrial F0 complex, subunit E (ATP5I), nuclear gene encoding mitochondrial protein, mRNA. | -4.07344 | -2.69211 | 0.007550578 |
| 1773352 | CCL5         | Homo sapiens chemokine (C-C motif) ligand 5 (CCL5), mRNA.                                                                                               | -3.60232 | -2.69098 | 0.007575606 |
| 1693560 | HMGA1        | Homo sapiens high mobility group AT-hook 1 (HMGA1), transcript variant 4, mRNA.                                                                         | 1.257295 | 2.690912 | 0.007577023 |
| 1709004 | LOC440092    | PREDICTED: Homo sapiens hypothetical LOC440092 (LOC440092), mRNA.                                                                                       | 1.864614 | 2.688745 | 0.007625032 |

|         |           |                                                                                                                                      |          |          |             |
|---------|-----------|--------------------------------------------------------------------------------------------------------------------------------------|----------|----------|-------------|
| 1708238 | OR52E2    | Homo sapiens olfactory receptor, family 52, subfamily E, member 2 (OR52E2), mRNA.                                                    | -1.47518 | -2.68779 | 0.007646278 |
| 3291741 | LOC255480 | PREDICTED: Homo sapiens hypothetical protein LOC255480 (LOC255480), mRNA.                                                            | 1.292354 | 2.686094 | 0.007684166 |
| 1914874 |           | Homo sapiens KRTAP25-1 mRNA for keratin associated protein, complete cds                                                             | -1.4483  | -2.68476 | 0.007714011 |
| 1781155 | LYN       | Homo sapiens v-yes-1 Yamaguchi sarcoma viral related oncogene homolog (LYN), mRNA.                                                   | 3.35972  | 2.682891 | 0.007756151 |
| 1697751 | GINS1     | Homo sapiens GINS complex subunit 1 (Psf1 homolog) (GINS1), mRNA.                                                                    | 1.379371 | 2.68187  | 0.00777923  |
| 1659142 | MDK       | Homo sapiens midkine (neurite growth-promoting factor 2) (MDK), transcript variant 2, mRNA.                                          | 1.347249 | 2.681217 | 0.007794018 |
| 1793670 | LOC649813 | PREDICTED: Homo sapiens hypothetical protein LOC649813 (LOC649813), mRNA.                                                            | -1.25833 | -2.67961 | 0.007830541 |
| 1726363 | LOC650810 | PREDICTED: Homo sapiens hypothetical protein LOC650810 (LOC650810), mRNA.                                                            | -1.0573  | -2.67834 | 0.007859382 |
| 1723709 | C9orf116  | Homo sapiens chromosome 9 open reading frame 116 (C9orf116), transcript variant 2, mRNA.                                             | -1.23739 | -2.6783  | 0.007860407 |
| 1772719 | GPN1      | Homo sapiens GPN-loop GTPase 1 (GPN1), mRNA.                                                                                         | -1.86928 | -2.67829 | 0.007860644 |
| 3301359 | LOC728591 | PREDICTED: Homo sapiens hypothetical protein LOC728591 (LOC728591), mRNA.                                                            | 1.247169 | 2.674776 | 0.007941249 |
| 1667966 | C1orf24   | Homo sapiens chromosome 1 open reading frame 24 (C1orf24), transcript variant 2, mRNA.                                               | 4.224298 | 2.674344 | 0.007951216 |
| 2117330 | NDUFB2    | Homo sapiens NADH dehydrogenase (ubiquinone) 1 beta subcomplex, 2, 8kDa (NDUFB2), nuclear gene encoding mitochondrial protein, mRNA. | -3.78134 | -2.67384 | 0.007962853 |
| 1791250 | EDA       | Homo sapiens ectodysplasin A (EDA), transcript variant 2, mRNA.                                                                      | 1.031798 | 2.672972 | 0.007982933 |
| 1663300 | PCDH11X   | Homo sapiens protocadherin 11 X-linked (PCDH11X), transcript variant d, mRNA.                                                        | -1.35953 | -2.671   | 0.008028771 |
| 1723735 | KIAA0889  | Homo sapiens KIAA0889 protein (KIAA0889), mRNA.                                                                                      | -1.06108 | -2.66896 | 0.008076293 |

|         |           |                                                                                                            |          |          |             |
|---------|-----------|------------------------------------------------------------------------------------------------------------|----------|----------|-------------|
| 1682428 | C1orf59   | Homo sapiens chromosome 1 open reading frame 59 (C1orf59), mRNA.                                           | -2.35827 | -2.66813 | 0.008095734 |
| 1787260 | LCE3B     | Homo sapiens late cornified envelope 3B (LCE3B), mRNA.                                                     | 1.088635 | 2.667859 | 0.008102157 |
| 2312732 | DPP8      | Homo sapiens dipeptidyl-peptidase 8 (DPP8), transcript variant 1, mRNA.                                    | 1.619742 | 2.667319 | 0.008114834 |
| 1667417 | RAB23     | Homo sapiens RAB23, member RAS oncogene family (RAB23), transcript variant 1, mRNA.                        | -1.30641 | -2.66245 | 0.008229953 |
| 1695108 | RSPO2     | Homo sapiens R-spondin 2 homolog ( <i>Xenopus laevis</i> ) (RSPO2), mRNA.                                  | 1.291668 | 2.661768 | 0.008246269 |
| 1755235 | XPO6      | Homo sapiens exportin 6 (XPO6), mRNA.                                                                      | 2.669143 | 2.656248 | 0.008378861 |
| 1683487 | ZNF154    | Homo sapiens zinc finger protein 154 (pHZ-92) (ZNF154), mRNA.                                              | -1.22459 | -2.65449 | 0.008421558 |
| 1810826 | MAK10     | Homo sapiens MAK10 homolog, amino-acid N-acetyltransferase subunit ( <i>S. cerevisiae</i> ) (MAK10), mRNA. | -1.18932 | -2.65298 | 0.008458322 |
| 1811955 | PRMT5     | Homo sapiens protein arginine methyltransferase 5 (PRMT5), transcript variant 1, mRNA.                     | 1.380706 | 2.651797 | 0.008487191 |
| 1724233 | LOC145783 | PREDICTED: Homo sapiens hypothetical protein LOC145783, transcript variant 2 (LOC145783), mRNA.            | 1.275588 | 2.649708 | 0.008538437 |
| 1712628 | GTF2IRD1  | Homo sapiens GTF2I repeat domain containing 1 (GTF2IRD1), transcript variant 1, mRNA.                      | -1.03907 | -2.64767 | 0.008588608 |
| 3294074 | LOC338870 | PREDICTED: Homo sapiens misc_RNA (LOC338870), miscRNA.                                                     | -3.48227 | -2.64579 | 0.008635454 |
| 3237169 | FOXD4L5   | Homo sapiens forkhead box D4-like 5 (FOXD4L5), mRNA.                                                       | -1.1969  | -2.6429  | 0.008707371 |
| 1870671 |           | yc39e06.r1 Stratagene liver (#937224) Homo sapiens cDNA clone IMAGE:83074 5, mRNA sequence                 | -1.15826 | -2.64172 | 0.008737046 |
| 1848273 | DNAH10    | Homo sapiens dynein, axonemal, heavy chain 10 (DNAH10), transcript variant 1, mRNA.                        | -1.27308 | -2.64154 | 0.008741557 |
| 1694608 | C1QTNF1   | Homo sapiens C1q and tumor necrosis factor related protein 1 (C1QTNF1), transcript variant 2, mRNA.        | 1.339911 | 2.639397 | 0.00879558  |



|         |           |                                                                                                                |          |          |             |
|---------|-----------|----------------------------------------------------------------------------------------------------------------|----------|----------|-------------|
| 2374036 | CTSL1     | Homo sapiens cathepsin L1 (CTSL1), transcript variant 2, mRNA.                                                 | -2.59989 | -2.63718 | 0.008851664 |
| 1654430 | LOC731170 | PREDICTED: Homo sapiens similar to eukaryotic translation elongation factor 1 alpha 2 (LOC731170), mRNA.       | -1.41194 | -2.63655 | 0.008867773 |
| 1854941 |           | DKFZp434E0926_s1 434 (synonym: htes3) Homo sapiens cDNA clone DKFZp434E0926 3, mRNA sequence                   | -1.22983 | -2.63254 | 0.008970517 |
| 3297898 | LOC729769 | PREDICTED: Homo sapiens similar to Ubiquinol-cytochrome c reductase hinge protein (LOC729769), mRNA.           | -4.07006 | -2.62886 | 0.009065662 |
| 1763637 | KIAA0226  | Homo sapiens KIAA0226 (KIAA0226), transcript variant 2, mRNA.                                                  | 1.355024 | 2.624136 | 0.009188958 |
| 1869278 |           | tj97h01.x1 NCI_CGAP_Lu24 Homo sapiens cDNA clone IMAGE:2149489 3, mRNA sequence                                | -2.65097 | -2.62409 | 0.009190227 |
| 3243334 | LOC645762 | PREDICTED: Homo sapiens similar to TRIM5/cyclophilin A V1 fusion protein (LOC645762), mRNA.                    | -1.5998  | -2.62303 | 0.009218104 |
| 1767685 | SERPINB7  | Homo sapiens serpin peptidase inhibitor, clade B (ovalbumin), member 7 (SERPINB7), transcript variant 1, mRNA. | 1.539651 | 2.621477 | 0.009259096 |
| 3301168 | LOC730052 | PREDICTED: Homo sapiens misc_RNA (LOC730052), miscRNA.                                                         | -2.26522 | -2.62098 | 0.009272233 |
| 2243553 | ZNF275    | Homo sapiens zinc finger protein 275 (ZNF275), mRNA.                                                           | 2.632119 | 2.620011 | 0.009297954 |
| 3245591 | DIO3OS    | Homo sapiens DIO3 opposite strand (non-protein coding) (DIO3OS), non-coding RNA.                               | 1.289761 | 2.619491 | 0.009311779 |
| 2200836 | HSPB7     | Homo sapiens heat shock 27kDa protein family, member 7 (cardiovascular) (HSPB7), mRNA.                         | 1.235948 | 2.618346 | 0.009342297 |
| 1814650 | TRAPPC4   | Homo sapiens trafficking protein particle complex 4 (TRAPPC4), mRNA.                                           | -1.96003 | -2.60984 | 0.009571683 |
| 1838655 |           | full-length cDNA clone CS0DIO53YO09 of Placenta Cot 25-normalised of Homo sapiens (human)                      | 1.202994 | 2.609767 | 0.009573687 |

|         |           |                                                                                                     |          |          |             |
|---------|-----------|-----------------------------------------------------------------------------------------------------|----------|----------|-------------|
| 1652015 | LOC647451 | PREDICTED: Homo sapiens similar to heat shock protein 90Bf (LOC647451), mRNA.                       | 1.219974 | 2.609516 | 0.009580554 |
| 1673232 | LASS1     | Homo sapiens LAG1 homolog, ceramide synthase 1 (LASS1), transcript variant 2, mRNA.                 | -1.18598 | -2.60804 | 0.00962086  |
| 1669023 | FHL5      | Homo sapiens four and a half LIM domains 5 (FHL5), mRNA.                                            | -1.0984  | -2.60695 | 0.009650776 |
| 1766320 | IL3       | Homo sapiens interleukin 3 (colony-stimulating factor, multiple) (IL3), mRNA.                       | -1.29911 | -2.60616 | 0.00967261  |
| 1813455 | SP110     | Homo sapiens SP110 nuclear body protein (SP110), transcript variant c, mRNA.                        | 2.982809 | 2.60559  | 0.009688204 |
| 1737805 | TPCN1     | Homo sapiens two pore segment channel 1 (TPCN1), mRNA.                                              | 1.292254 | 2.604189 | 0.009726901 |
| 1850086 |           | DKFZp779O1834_r1 779 (synonym: hncc1) Homo sapiens cDNA clone DKFZp779O1834 5, mRNA sequence        | 1.71817  | 2.604002 | 0.009732063 |
| 1705892 | SH2D1A    | Homo sapiens SH2 domain protein 1A, Duncan's disease (lymphoproliferative syndrome) (SH2D1A), mRNA. | -3.6569  | -2.60365 | 0.009741798 |
| 3225329 | LOC728847 | PREDICTED: Homo sapiens hypothetical LOC728847 (LOC728847), mRNA.                                   | -1.39924 | -2.60137 | 0.00980528  |
| 3251747 | UNCX      | Homo sapiens UNC homeobox (UNCX), mRNA.                                                             | 1.162511 | 2.600296 | 0.00983512  |
| 2369403 | PALM2     | Homo sapiens paralemmin 2 (PALM2), transcript variant 2, mRNA.                                      | 1.168809 | 2.599318 | 0.009862469 |
| 2143671 | KPTN      | Homo sapiens kaptin (actin binding protein) (KPTN), mRNA.                                           | -1.19035 | -2.59918 | 0.009866448 |
| 1740903 | C7orf49   | Homo sapiens chromosome 7 open reading frame 49 (C7orf49), mRNA.                                    | 1.181736 | 2.59912  | 0.009868027 |
| 1882041 | LOC729025 | PREDICTED: Homo sapiens similar to peptide/histidine transporter (LOC729025), mRNA.                 | -1.14133 | -2.59778 | 0.00990552  |
| 2290338 | RCAN1     | Homo sapiens regulator of calcineurin 1 (RCAN1), transcript variant 1, mRNA.                        | 1.136353 | 2.597277 | 0.009919784 |

SUPPLEMENTARY Table S3. Gene networks associated with methylation at cg01395541 obtained using DAVID.

| Category         | Term                                                                                                                                                                                                | Count | %        | PValue   | Genes                                                                                                                                                                                                                                                                                                                                                                                                                                                                                                                                                                   | List Total | Pop Hits | Pop Total |
|------------------|-----------------------------------------------------------------------------------------------------------------------------------------------------------------------------------------------------|-------|----------|----------|-------------------------------------------------------------------------------------------------------------------------------------------------------------------------------------------------------------------------------------------------------------------------------------------------------------------------------------------------------------------------------------------------------------------------------------------------------------------------------------------------------------------------------------------------------------------------|------------|----------|-----------|
| GAD_DISEASE      | Opioid-Related Disorders                                                                                                                                                                            | 3     | 1.886792 | 0.002347 | OPRM1, MYOCD, DRD2                                                                                                                                                                                                                                                                                                                                                                                                                                                                                                                                                      | 97         | 10       | 12971     |
| GAD_DISEASE      | Hyperparathyroidism, Secondary                                                                                                                                                                      | 6     | 3.773585 | 0.00454  | OPRM1_IL3, IL2RA, KCNE1, SCN1B, IL7R                                                                                                                                                                                                                                                                                                                                                                                                                                                                                                                                    | 97         | 146      | 12971     |
| GAD_DISEASE      | methamphetamine abuse                                                                                                                                                                               | 3     | 1.886792 | 0.00608  | OPRM1, SLC6A9, DRD2                                                                                                                                                                                                                                                                                                                                                                                                                                                                                                                                                     | 97         | 16       | 12971     |
| GAD_DISEASE      | Glomerulonephritis, IGA                                                                                                                                                                             | 5     | 3.144654 | 0.010424 | MTMR3, ENPP1, DRD2, SERPINB7, CCL5                                                                                                                                                                                                                                                                                                                                                                                                                                                                                                                                      | 97         | 115      | 12971     |
| GAD_DISEASE      | Alcoholism                                                                                                                                                                                          | 10    | 6.289308 | 0.012966 | OPRM1, CAV3, DCC, EYA2, CSRN3, DRD2, TMEM218, CXXC4, PPP2R2B, HMGAI                                                                                                                                                                                                                                                                                                                                                                                                                                                                                                     | 97         | 509      | 12971     |
| GAD_DISEASE      | height                                                                                                                                                                                              | 6     | 3.773585 | 0.028379 | NOG, LYN, MAP3K3, PALM2, SERPINI1, HMGAI                                                                                                                                                                                                                                                                                                                                                                                                                                                                                                                                | 97         | 231      | 12971     |
| GAD_DISEASE      | Postoperative Nausea and Vomiting                                                                                                                                                                   | 2     | 1.257862 | 0.029281 | OPRM1, DRD2                                                                                                                                                                                                                                                                                                                                                                                                                                                                                                                                                             | 97         | 4        | 12971     |
| GAD_DISEASE      | alcohol dependence                                                                                                                                                                                  | 3     | 1.886792 | 0.030523 | OPRM1, DRD2, PPP2R2B                                                                                                                                                                                                                                                                                                                                                                                                                                                                                                                                                    | 97         | 37       | 12971     |
| GAD_DISEASE      | Obesity POF - Premature ovarian failure POLYCYSTIC OVARIAN SYNDROME Polycystic Ovary Syndrome Primary Ovarian Insufficiency Puberty, Delayed Puberty, Precocious Thrombophilia Tobacco Use Disorder | 6     | 3.773585 | 0.03795  | OPRM1, NOG, DRD2, CCL5, CASC1, FSHR                                                                                                                                                                                                                                                                                                                                                                                                                                                                                                                                     | 97         | 250      | 12971     |
| GAD_DISEASE      | Bladder Cancer                                                                                                                                                                                      | 9     | 5.660377 | 0.042077 | OPRM1_IL3, RFC4, ENPP1, DRD2, NPAT, CD40, CCL5, IL7R                                                                                                                                                                                                                                                                                                                                                                                                                                                                                                                    | 97         | 529      | 12971     |
| GAD_DISEASE      | alcohol dependency                                                                                                                                                                                  | 2     | 1.257862 | 0.043601 | OPRM1, DRD2                                                                                                                                                                                                                                                                                                                                                                                                                                                                                                                                                             | 97         | 6        | 12971     |
| GOTERM_BP_DIRECT | GO:0006955~immune response                                                                                                                                                                          | 12    | 7.54717  | 0.000561 | IL3, IL2RA, ENPP1, GZMA, OTUD7B, DPP8, CTSC, CD40, CCL5, IL7R, EDA, SPN                                                                                                                                                                                                                                                                                                                                                                                                                                                                                                 | 135        | 421      | 16792     |
| GOTERM_BP_DIRECT | GO:1900273~positive regulation of long-term synaptic                                                                                                                                                | 3     | 1.886792 | 0.003316 | DRD2, RELN, STAU1                                                                                                                                                                                                                                                                                                                                                                                                                                                                                                                                                       | 135        | 11       | 16792     |
| GOTERM_BP_DIRECT | GO:0006968~cellular defense response                                                                                                                                                                | 4     | 2.515723 | 0.013341 | SH2D1A, RAB23, KIR2DS3, SPN                                                                                                                                                                                                                                                                                                                                                                                                                                                                                                                                             | 135        | 62       | 16792     |
| GOTERM_BP_DIRECT | GO:0030216~keratinocyte differentiation                                                                                                                                                             | 4     | 2.515723 | 0.022887 | LCE3B, SPRR2B, LATS1, INTU                                                                                                                                                                                                                                                                                                                                                                                                                                                                                                                                              | 135        | 76       | 16792     |
| GOTERM_BP_DIRECT | GO:0070668~positive regulation of mast cell proliferation                                                                                                                                           | 2     | 1.257862 | 0.023751 | IL3, LYN                                                                                                                                                                                                                                                                                                                                                                                                                                                                                                                                                                | 135        | 3        | 16792     |
| GOTERM_BP_DIRECT | GO:0002027~regulation of heart rate                                                                                                                                                                 | 3     | 1.886792 | 0.0284   | CAV3, DRD2, HCN4                                                                                                                                                                                                                                                                                                                                                                                                                                                                                                                                                        | 135        | 33       | 16792     |
| GOTERM_BP_DIRECT | GO:0002768~immune response-regulating cell surface receptor signaling pathway                                                                                                                       | 2     | 1.257862 | 0.031543 | LYN, CD40                                                                                                                                                                                                                                                                                                                                                                                                                                                                                                                                                               | 135        | 4        | 16792     |
| GOTERM_BP_DIRECT | GO:0042531~positive regulation of tyrosine phosphorylation of STAT protein                                                                                                                          | 2     | 1.257862 | 0.039273 | LYN, CCL5                                                                                                                                                                                                                                                                                                                                                                                                                                                                                                                                                               | 135        | 5        | 16792     |
| GOTERM_BP_DIRECT | GO:0051209~release of sequestered calcium ion into cytosol                                                                                                                                          | 3     | 1.886792 | 0.042329 | DRD2, TPCN1, TRPM2                                                                                                                                                                                                                                                                                                                                                                                                                                                                                                                                                      | 135        | 41       | 16792     |
| GOTERM_BP_DIRECT | GO:0035335~peptidyl-tyrosine dephosphorylation                                                                                                                                                      | 4     | 2.515723 | 0.044805 | MTMR3, EYA2, DUSP13, PTPN4                                                                                                                                                                                                                                                                                                                                                                                                                                                                                                                                              | 135        | 99       | 16792     |
| GOTERM_CC_DIRECT | GO:0009897~external side of plasma membrane                                                                                                                                                         | 6     | 3.773585 | 0.023716 | IL2RA, CD40, SCNN1B, IL7R, KLRD1, SPN                                                                                                                                                                                                                                                                                                                                                                                                                                                                                                                                   | 140        | 213      | 18224     |
| GOTERM_CC_DIRECT | GO:0005929~cilium                                                                                                                                                                                   | 5     | 3.144654 | 0.028553 | DNAH10, INV5, TMEM218, ARL6, FLCN                                                                                                                                                                                                                                                                                                                                                                                                                                                                                                                                       | 140        | 151      | 18224     |
| GOTERM_CC_DIRECT | GO:0060170~ciliary membrane                                                                                                                                                                         | 3     | 1.886792 | 0.049952 | CLTB, DRD2, ARL6                                                                                                                                                                                                                                                                                                                                                                                                                                                                                                                                                        | 140        | 47       | 18224     |
| GOTERM_MF_DIRECT | GO:0005515~protein binding                                                                                                                                                                          | 80    | 50.31447 | 0.042754 | OPRM1, SH3BP1, RPL36A, NOG, CLTB, XPO6, UFC1, CSORF116, FLCN, LATS1, IGR4, SH2D1A, MYOCD, TRIM9, PRMT5, RSPO2, C7ORF49, LSM5, RAB23, KLRD1, MRPL51, BEND3, LYN, GZMA, TTC7B, APTX, CNPY2, CD40, ARL6, ARHGEF12, UBE2B, HMGAI, FSHR, KRT18, RFC4, EYA2, HSPB7, TRAPP4, CTSC, STMN1, EDA, INTU, CAV3, PPP4R4, GPN1, DCC, CNBP, MGAT5B, ENPP1, DRD2, SLC39A13, SHFM1, TMEM218, FHL5, NEDD8, CCL5, IL7R, TPCN1, STAU1, MTMR3, RAB43, MAP3K3, DUSP13, FRG1, CIQTNF1, NPAT, KCNE1, OTUD7B, POU3F2, SCNN1B, PPP2R2B, SSK1, RFK4, PTPN4, ELAVL2, VAT1L, INVS, PTCO3, PC, DNAJB5 | 133        | 8785     | 16881     |
| GOTERM_MF_DIRECT | GO:0004725~protein tyrosine phosphatase activity                                                                                                                                                    | 4     | 2.515723 | 0.043687 | MTMR3, EYA2, DUSP13, PTPN4                                                                                                                                                                                                                                                                                                                                                                                                                                                                                                                                              | 133        | 100      | 16881     |

| Category       | Term                                             | Count | %        | PValue   | Genes                                                                                                                                                                                                                                                                                                                                                                                                                                                                                                                                                                                                                                                             | List Total | Pop Hits | Pop Total |
|----------------|--------------------------------------------------|-------|----------|----------|-------------------------------------------------------------------------------------------------------------------------------------------------------------------------------------------------------------------------------------------------------------------------------------------------------------------------------------------------------------------------------------------------------------------------------------------------------------------------------------------------------------------------------------------------------------------------------------------------------------------------------------------------------------------|------------|----------|-----------|
| INTERPRO       | IPR010414:FRG1-like                              | 2     | 1.257862 | 0.014817 | FRG1, LOC283788                                                                                                                                                                                                                                                                                                                                                                                                                                                                                                                                                                                                                                                   | 139        | 2        | 18559     |
| INTERPRO       | IPR000315:Zinc finger, B-box                     | 4     | 2.515723 | 0.023256 | TRIM9, TRIM71, TRIM74, TRIM60                                                                                                                                                                                                                                                                                                                                                                                                                                                                                                                                                                                                                                     | 139        | 82       | 18559     |
| INTERPRO       | IPR017907:Zinc finger, RING-type, conserved site | 5     | 3.144654 | 0.037533 | SH3RF1, TRIM9, TRIM71, TRIM74, TRIM60                                                                                                                                                                                                                                                                                                                                                                                                                                                                                                                                                                                                                             | 139        | 169      | 18559     |
| INTERPRO       | IPR002131:Glycoprotein hormone receptor          | 2     | 1.257862 | 0.043799 | FSHR, LGR4                                                                                                                                                                                                                                                                                                                                                                                                                                                                                                                                                                                                                                                        | 139        | 6        | 18559     |
| KEGG_PATHWAY   | hsa04060:Cytokine-cytokine receptor interaction  | 6     | 3.773585 | 0.037747 | IL3, IL2RA, CD40, CCL5, IL7R, EDA                                                                                                                                                                                                                                                                                                                                                                                                                                                                                                                                                                                                                                 | 57         | 230      | 6910      |
| SMART          | SM00336:BBOX                                     | 4     | 2.515723 | 0.017071 | TRIM9, TRIM71, TRIM74, TRIM60                                                                                                                                                                                                                                                                                                                                                                                                                                                                                                                                                                                                                                     | 75         | 74       | 10057     |
| UP_KEYWORDS    | Sodium transport                                 | 5     | 3.144654 | 0.009261 | SLC5A2, ATP1B3, SCNN1B, HCN4, TRPM2                                                                                                                                                                                                                                                                                                                                                                                                                                                                                                                                                                                                                               | 145        | 117      | 20581     |
| UP_KEYWORDS    | Sodium                                           | 5     | 3.144654 | 0.01129  | SLC5A2, ATP1B3, SCNN1B, HCN4, TRPM2                                                                                                                                                                                                                                                                                                                                                                                                                                                                                                                                                                                                                               | 145        | 124      | 20581     |
| UP_KEYWORDS    | Developmental protein                            | 14    | 8.805031 | 0.015885 | DCC, NOG, EYA2, INVS, GTF2IRD1, RAB23, RELN, STMN1, EDA, TRIM71, MDK, INTU, LGR4, UNCX                                                                                                                                                                                                                                                                                                                                                                                                                                                                                                                                                                            | 145        | 949      | 20581     |
| UP_KEYWORDS    | Sodium channel                                   | 3     | 1.886792 | 0.017443 | SCNN1B, HCN4, TRPM2                                                                                                                                                                                                                                                                                                                                                                                                                                                                                                                                                                                                                                               | 145        | 29       | 20581     |
| UP_KEYWORDS    | Alternative splicing                             | 88    | 55.34591 | 0.018502 | OPRM1, SLC5A2, SH3RF1, CLTB, ATP1B3, XPO6, C9ORF116, FLCN, LATS1, LGR4, NFATC2IP, SH2D1A, MYOCD, TRIM9, PRMT5, RSPO2, S1PR5, LSM5, C7ORF49, DPP8, KLRD1, PCDHGA10, TMEM201, LYN, PCDH11X, METTL6, TTC7B, APTX, CNPY2, CD40, ARL6, ARHGFE12, HMGAI1, ARRDC2, FSHR, TRPM2, EYA2, RFC4, GTF2IRD1, SERPINB7, HSPB7, TRAPPC4, CTSC, RELN, STMN1, EDA, INTU, TM6SF2, GPN1, PPP4R4, ZNF275, DNAH10, CNBP, MGAT5B, DRD2, SLC39A13, SP110, ANAPC11, IL7R, MDK, TRIM74, TPCN1, C12ORF54, STAU1, MTMR3, RAB43, MAP3K3, DUSP13, TOMM5, C10TNF1, PALM2, OTUD7B, SCNN1B, PPP2R2B, CPA4, BOLA3, RFX4, RCAN1, ELAVL2, CASCI, SLC6A9, CSRNIP3, INVS, PTC3, KPTN, USP48, PC, DNAJB5 | 145        | 10587    | 20581     |
| UP_KEYWORDS    | Cytoplasm                                        | 44    | 27.67296 | 0.043747 | PPP4R4, OPRM1, GPN1, SH3RF1, DNAH10, RPL36A, CNBP, XPO6, CXXC4, ANAPC11, FLCN, TRIM71, LATS1, STAU1, NFATC2IP, MTMR3, SH2D1A, DUSP13, FRG1, TRIM9, PRMT5, SPRR2B, RAB23, OTUD7B, C7ORF49, DPP8, PPP2R2B, LYN, PTPN4, TTC7B, APTX, ARL6, ARHGFE12, EYA2, KRT18, INVS, EIF5A11, HSPB7, BNC1, SERPINB7, KPTN, STMN1, USP48, INTU                                                                                                                                                                                                                                                                                                                                     | 145        | 4816     | 20581     |
| UP_SEQ_FEATURE | zinc finger region:RING-type                     | 6     | 3.773585 | 0.026643 | SH3RF1, TRIM9, ANAPC11, TRIM71, TRIM74, TRIM60                                                                                                                                                                                                                                                                                                                                                                                                                                                                                                                                                                                                                    | 147        | 230      | 20063     |
| UP_SEQ_FEATURE | splice variant                                   | 68    | 42.7673  | 0.044509 | OPRM1, SH3RF1, CLTB, C9ORF116, FLCN, LATS1, NFATC2IP, SH2D1A, MYOCD, TRIM9, RSPO2, S1PR5, C7ORF49, DPP8, KLRD1, PCDHGA10, TMEM201, LYN, GZMA, PCDH11X, METTL6, TTC7B, APTX, CNPY2, CD40, ARHGFE12, ARRDC2, HMGAI1, FSHR, TRPM2, EYA2, GTF2IRD1, EIF5A11, HSPB7, RELN, EDA, INTU, PPP4R4, DNAH10, CNBP, MGAT5B, DRD2, SLC39A13, SP110, ANAPC11, IL7R, TRIM74, C12ORF54, TPCN1, STAU1, MTMR3, DUSP13, MAP3K3, PALM2, POU3F2, SCNN1B, PPP2R2B, RFX4, ELAVL2, RCAN1, CASCI, SLC6A9, INVS, CSRNIP3, PTC3, LOC728026, USP48, DNAJB5                                                                                                                                     | 147        | 7760     | 20063     |

SUPPLEMENTARY Figure S3. Intra- and inter-chromosomal interactions between the *SPDEF* promoter region and *trans*-genes.

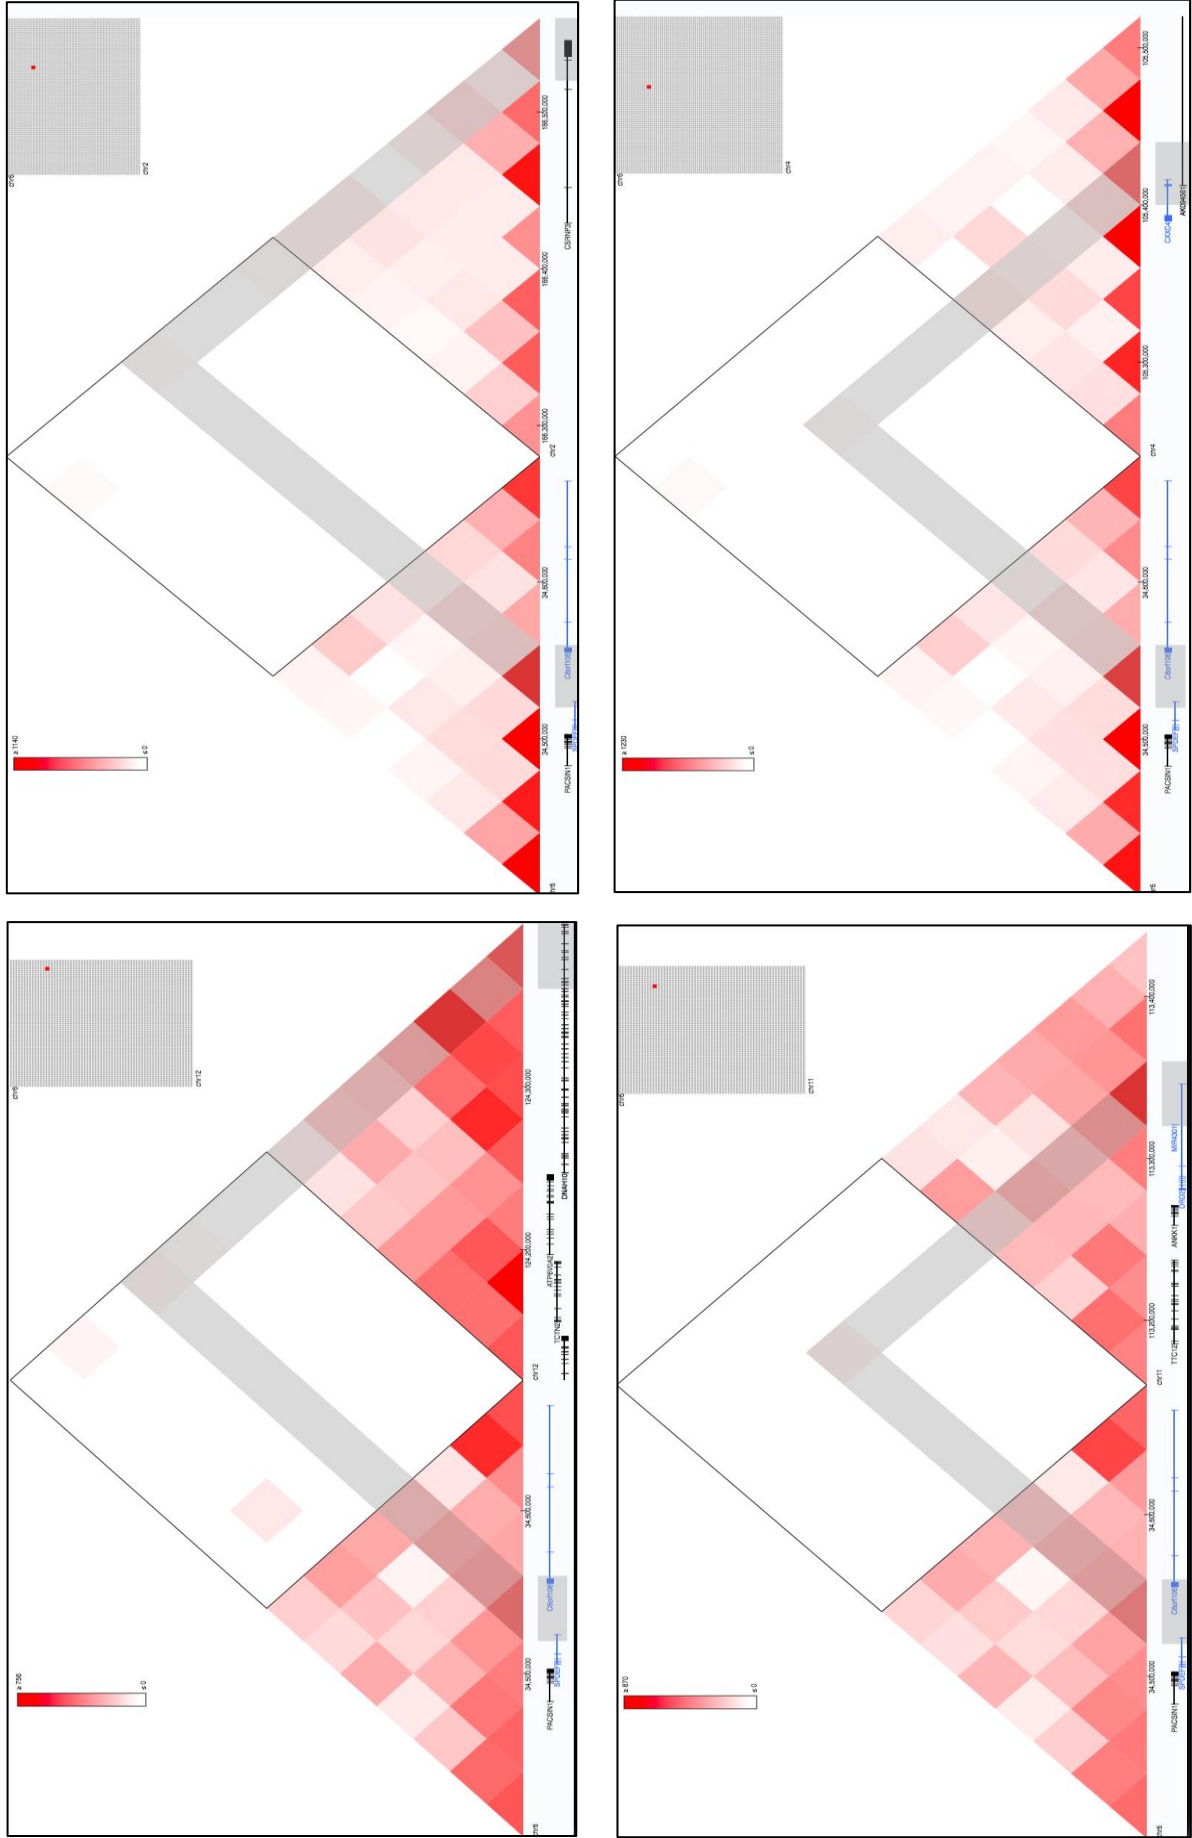

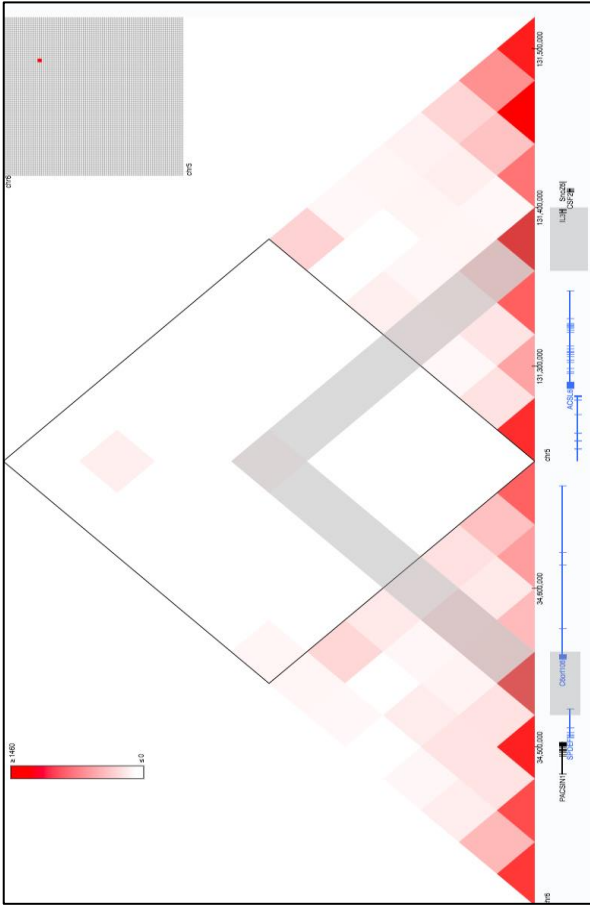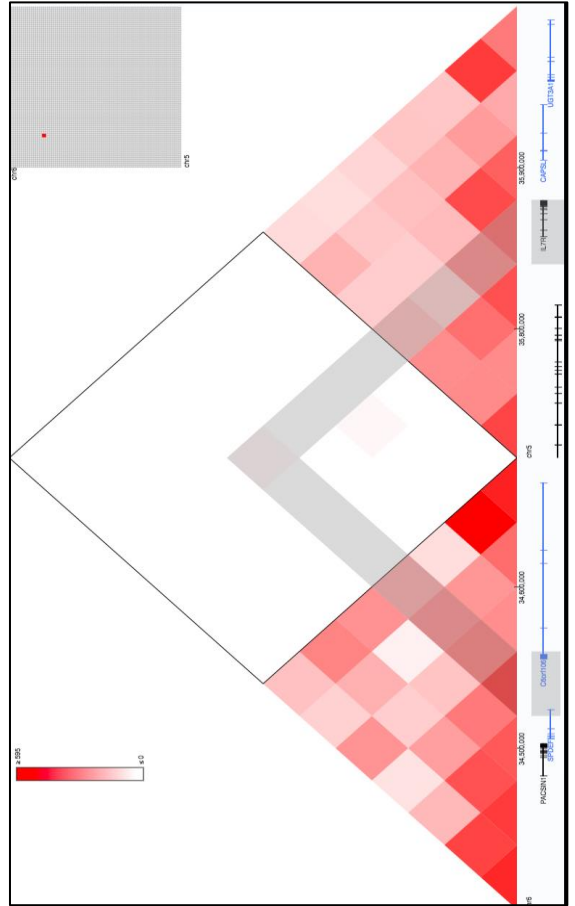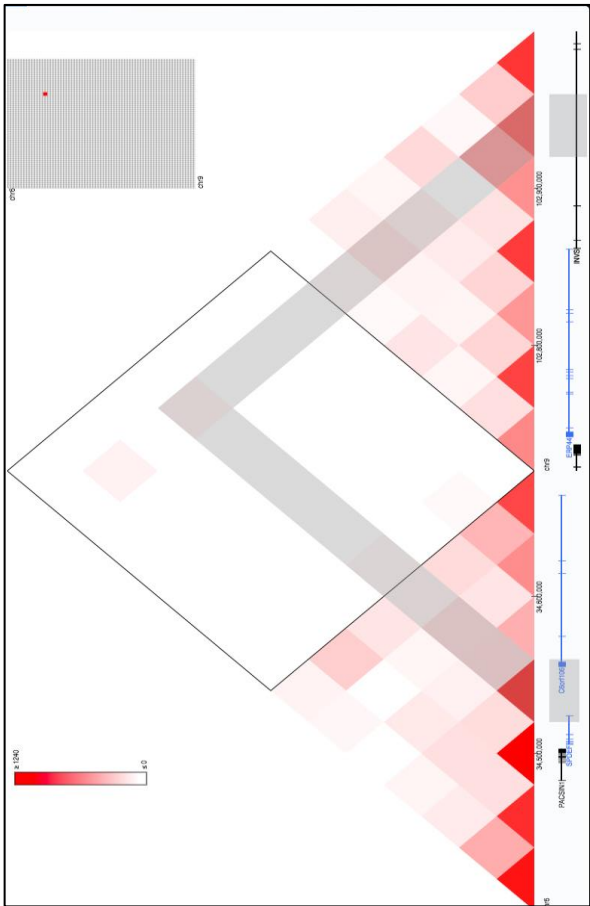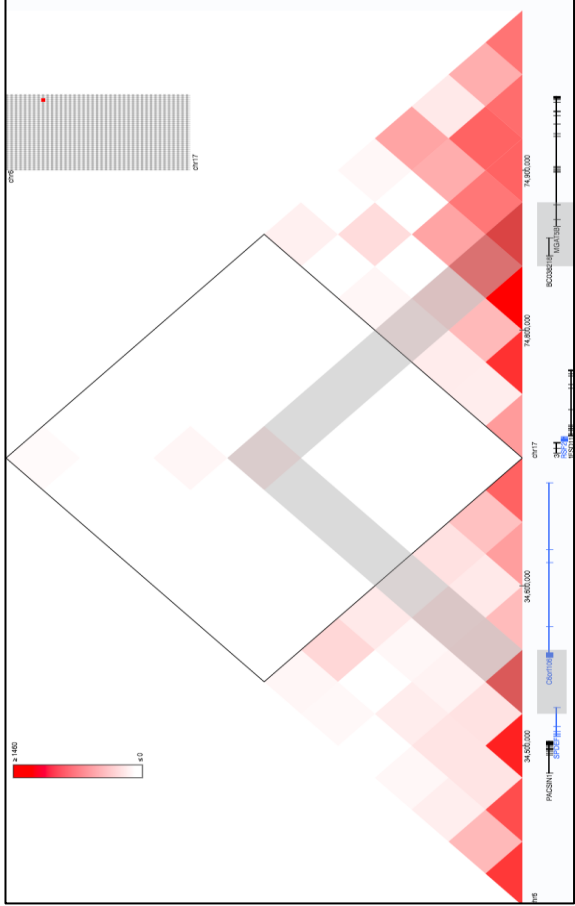

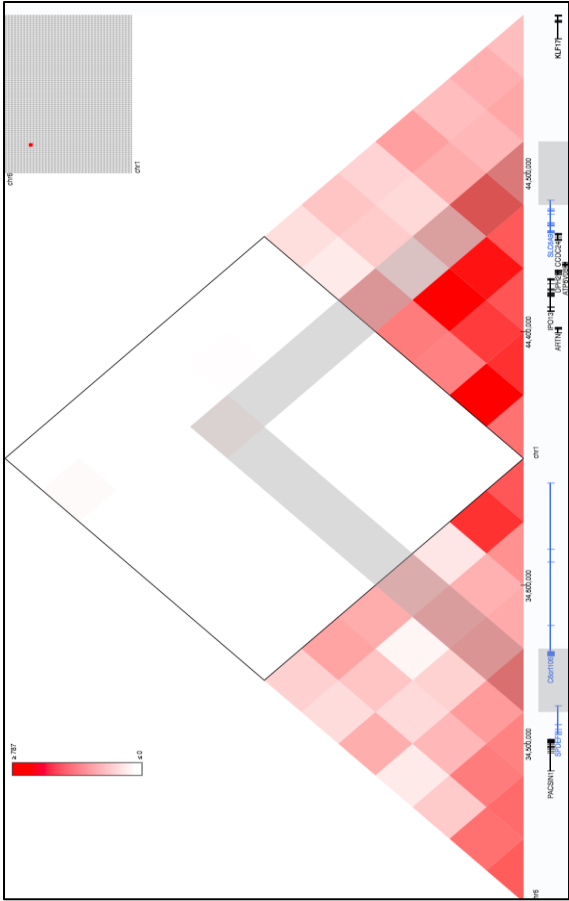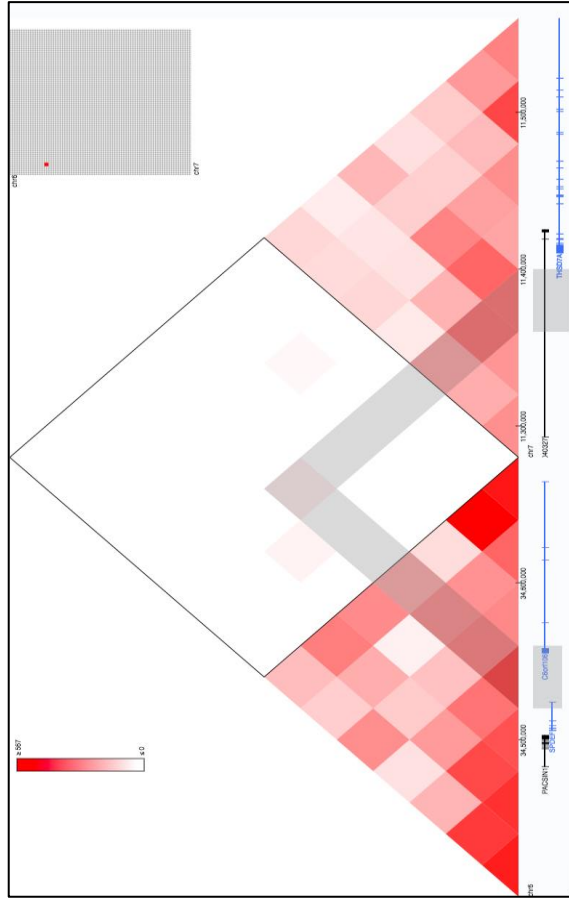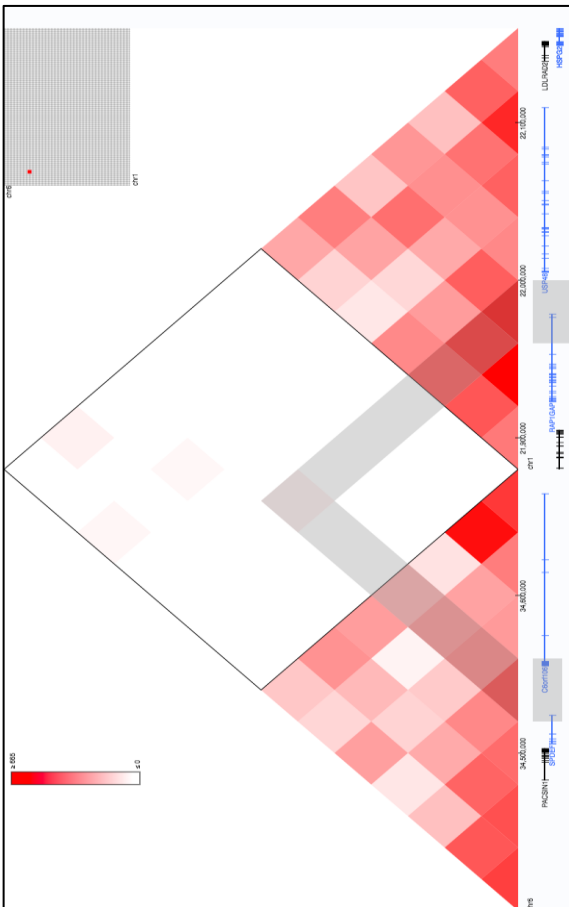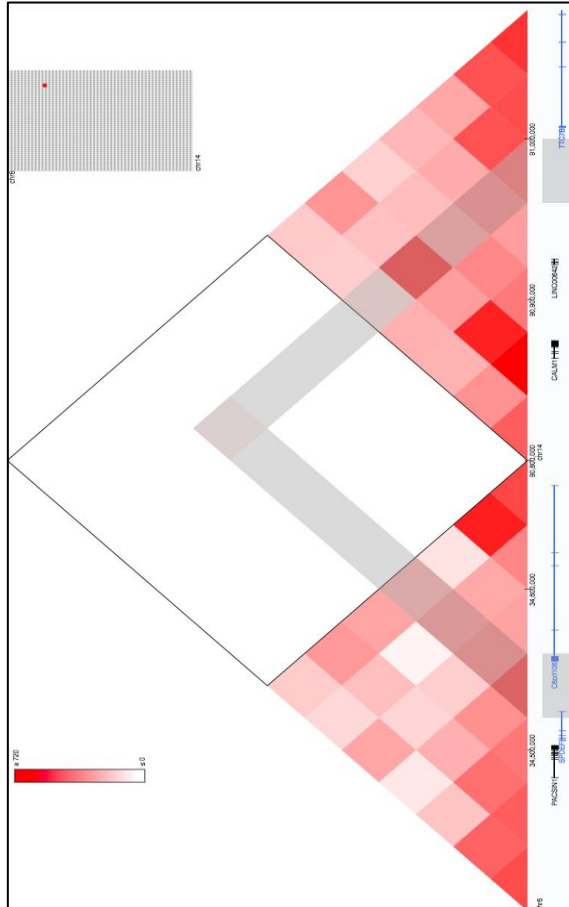

## ***R code for Bump Hunting Analysis***

```
library(minfi)
library(RColorBrewer)
setwd("/home/yun/projects/wave2")
mypar <- function(a=1,b=1,brewer.n=8,brewer.name="Dark2",...){
  par(mar=c(2.5,2.5,2,2),mgp=c(1.5,.5,0))
  par(mfrow=c(a,b),...)
  palette(brewer.pal(brewer.n,brewer.name))
}

##### Load object
load("./rdas/object.rda")
load("./rdas/cellcount.rda")

meth <- readRDS("/home/tianye/Methylation_Both_Waves/PSC2_Beta_Recoded.rds")
pheno <- readRDS("/home/tianye/Methylation_Both_Waves/LEQ_Lifeevents.rds")
wave <- readRDS("/home/tianye/Methylation_Both_Waves/PSC2_with_Wave_Info.rds")
stopifnot(identical(colnames(meth),as.character(wave[,1])))

##remove duplicated samples
idx <- !duplicated(colnames(meth))
meth <- meth[,idx]
wave <- wave[idx,]
pheno <- pheno[match(as.character(wave[,1]),as.character(pheno[,1])),]
stopifnot(identical(as.character(pheno[,1]),as.character(wave[,1])))
pheno <- cbind(pheno,wave[,2])
colnames(pheno)[16] <- "Wave1"

fileName <- "./rdas/id_match.rda"
if (file.exists(fileName)) {
  load(fileName)
} else {fileName
  load("./rdas/beta.rda")
  beta <- beta[,beta[,2] %in% meth[,2]]
  meth <- meth[,match(beta[,2],meth[,2])]
  id_match <- matrix(ncol=2,nrow=ncol(beta))
  id_match[,1] <- colnames(beta)
  id_match[,2] <- colnames(meth)
  colnames(id_match) <- c("meth","PSC2")
  id_match <- data.frame(id_match)
  tmp <- read.delim("/home/tianye/Methylation_Both_Waves/PSC1_to_PSC2.txt",as.is=T)
  tmp <- tmp[match(as.character(id_match[,1]),as.character(tmp[,1])),]
  stopifnot(identical(as.character(id_match[,2]),as.character(tmp[,2])))
  save(id_match, file=fileName)
}

object <- object[,colnames(object) %in% id_match[,1]]
stopifnot(identical(colnames(object),as.character(id_match[,1])))
cellcount <- cellcount[rownames(cellcount) %in% id_match[,1],]
stopifnot(identical(rownames(cellcount),as.character(id_match[,1])))
```



```

pheno <- pheno[match(id_match[,2],pheno[,1]),]
stopifnot(identical(as.character(pheno[,1]),as.character(id_match[,2])))

gender <- readRDS("/home/tianye/Methylation_Both_Waves/PSC2_Data_Covariates_Complete.rds")
gender <- gender[match(pheno[,1],gender[,1]),]
pheno <-
cbind(pheno,gender[,c("Gender_Male_Recoded","Gender_Male_Predicted","Gender_Male_Combined")])

##remove samples with no gender information
idx <- pheno[,"Gender_Male_Recoded"]==1 & pheno[,"Gender_Male_Predicted"]==0 |
pheno[,"Gender_Male_Recoded"]==0 & pheno[,"Gender_Male_Predicted"]==1 |
is.na(pheno[,"Gender_Male_Combined"])
idx[is.na(idx)] <- F
object <- object[,!idx]
cellcount <- cellcount[!idx,]
pheno <- pheno[!idx,]

sex=factor(ifelse(pheno$Gender_Male_Combined==1,"M","F"),c("M","F"))
tmp <- cellcount - rowMeans(cellcount)
pc <- prcomp(tmp)

##remove sex chromosome
auIndex<-which(!seqnames(object)%in%c("chrX","chrY"))
object <- object[auIndex,]

#####
##### bumphunting #####
#####
##3 cores, 100GB memory, overnight
for (i in colnames(pheno)[c(4:5,8:15)]){
  print(i)
  tt=as.numeric(pheno[,i])
  Index <- !is.na(tt) & !is.na(pheno[,2])
  design=model.matrix(~tt[Index]+pheno[Index,2]+sex[Index]+factor(pheno$Wave1)[Index]+pc$x[Index
,1]+pc$x[Index,2])
  ###need to adjust for age, if available

  fileName <- paste("./rdas/",i,"_res_adj_LEQ.rda",sep="")
  if (file.exists(fileName)) {
    load(fileName)
  } else {
    library(doParallel)
    registerDoParallel(cores=4)
    res=bumphunter(object[,Index], design, B=1000, smooth=FALSE, type="Beta", pickCutoff=T)
    save(res,file=fileName)
  }

  if(nrow(res$table)>1){
    genes=matchGenes(res$table,build="hg19")
    res$table=cbind(res$table,genes)
    write.csv(res$table,file=paste("./tables/",i,"_bumphunter_adj_LEQ.csv",sep=""))
  }
}

```

```

for (i in colnames(pheno)[c(6,7)]){
  print(i)
  tt=as.numeric(pheno[,i])
  Index <- !is.na(tt) & !is.na(pheno[,3])
  design=model.matrix(~tt[Index]+pheno[Index,3]+sex[Index]+factor(pheno$Wave1)[Index]+pc$x[Index
,1]+pc$x[Index,2])
  ###need to adjust for age, if available

  fileName <- paste("./rdas/",i,"_res_adj_LEQ.rda",sep="")
  if (file.exists(fileName)) {
    load(fileName)
  } else {
    library(doParallel)
    registerDoParallel(cores=4)
    res=bumphunter(object[,Index], design, B=1000, smooth=FALSE, type="Beta", pickCutoff=T)
    save(res,file=fileName)
  }

  if(nrow(res$table)>1){
    genes=matchGenes(res$table,build="hg19")
    res$table=cbind(res$table,genes)
    write.csv(res$table,file=paste("./tables/",i,"_bumphunter_adj_LEQ.csv",sep=""))
  }

#####
##### DMR plotting #####
#####
tab1 <- read.csv(file="./tables/For_figure.csv",as.is=T)
tab <- GRanges(seqnames = Rle(tab1$chr), ranges = IRanges(start = tab1$start-1000, end = tab1$end+1000))
values(tab)<-cbind(as.character(tab1$name),as.character(tab1$description),tab1$distance)
pos=start(object)
b=getBeta(object)
as.fumeric<- function(x,...) as.numeric(as.factor(x,...))

pdf(file="./figs/DMRs.pdf", width=8, height=3.5)
M=min(nrow(tab1),300)
for(i in 1:2){
  mypar
  idx=subjectHits(findOverlaps(tab[i],object))
  x=pos[idx]
  bb=b[idx,]

  tmp=pheno[,tab1[i,1]]
  tt <- as.character(tmp)
  tt[tmp<3] <- "1.low"
  tt[tmp<7 & tmp>2] <- "2.middle"
  tt[tmp>6] <- "3.high"
  tt <- factor(tt)

  matplot(jitter(x),bb,col=as.fumeric(tt),ylim=c(0,1),main=paste(tab$V2[i],":",tab$V1[i]),cex=0.75,pch=1
6,xlab=paste("location on",seqnames(tab)[i]),ylab="Beta")

```

```

tmpIndexes=split(1:ncol(bb),tt)
for(j in seq(along=tmpIndexes)){
  bbb=rowMeans(bb[,tmpIndexes[[j]])
  lfit=loess(bbb~x,span=0.75)
  lines(x,lfit$fitted,col=j)
}
legend("bottomleft",legend=levels(tt),col=seq(along=levels(tt)),lty=1)
legend("bottomright",tab1[i,1])
}

for(i in 3:M){
  mypar
  idx=subjectHits(findOverlaps(tab[i],object))
  x=pos[idx]
  bb=b[idx,]

  tt=factor(pheno[,tab1[i,1]])

  matplot(jitter(x),bb,col=as.fumeric(tt),ylim=c(0,1),main=paste(tab$V2[i],":",tab$V1[i]),cex=0.75,pch=1
6,xlab=paste("location on",seqnames(tab)[i]),ylab="Beta")
  tmpIndexes=split(1:ncol(bb),tt)
  for(j in seq(along=tmpIndexes)){
    bbb=rowMeans(bb[,tmpIndexes[[j]])
    lfit=loess(bbb~x,span=0.75)
    lines(x,lfit$fitted,col=j)
  }
  legend("bottomleft",legend=levels(tt),col=seq(along=levels(tt)),lty=1)
  legend("bottomright",tab1[i,1])
}

dev.off()

rm(list=ls())
q()

```

- (1) Loth E, Poline J, Thyreau B, Jia T, Tao C, Lourdasamy A, et al. Oxytocin Receptor Genotype Modulates Ventral Striatal Activity to Social Cues and Response to Stressful Life Events. *Biol Psychiatry* 2014 2018/04;76(5):367-376.
- (2) Andersson HB, A K. The ESPAD Report: Alcohol and Other Drug Use Among Students in 35 European Countries. : Modintryckoffset AB: Stockholm; 2003.
- (3) Hibell B, Andersson B, Bjarnason T, Kokkevi A, Morgan M, Narusk A. The ESPAD Report. Alcohol and Other Drug Use Among Students in 35 European Countries. 1997.
- (4) Li LC, Dahiya R. MethPrimer: designing primers for methylation PCRs. *Bioinformatics* 2002;18(11):1427-1431.
- (5) Sasik R, Calvo E, Corbeil J. Statistical analysis of high-density oligonucleotide arrays: a multiplicative noise model. *Bioinformatics* 2002;18(12):1633-1640.
- (6) Jaffe AE, Irizarry RA. Accounting for cellular heterogeneity is critical in epigenome-wide association studies. *Genome Biol* 2014 02/04; 10/16/received; 02/04/accepted;15(2):R31-R31.
- (7) Houseman EA, Accomando WP, Koestler DC, Christensen BC, Marsit CJ, Nelson HH, et al. DNA methylation arrays as surrogate measures of cell mixture distribution. *BMC Bioinformatics* 2012 05/08;13(1):86.
- (8) Jaffe AE, Murakami P, Lee H, Leek JT, Fallin MD, Feinberg AP, et al. Bump hunting to identify differentially methylated regions in epigenetic epidemiology studies. *International Journal of Epidemiology* 2012;41(1):200-209.
- (9) Aryee MJ, Jaffe AE, Corrada-Bravo H, Ladd-Acosta C, Feinberg AP, Hansen KD, et al. Minfi: a flexible and comprehensive Bioconductor package for the analysis of Infinium DNA methylation microarrays. 2014;30:1363-1369.
- (10) David.ncifcrf.gov. Functional Annotation Tool. 2007; Available at: [https://david.ncifcrf.gov/helps/functional\\_annotation.html](https://david.ncifcrf.gov/helps/functional_annotation.html). Accessed 21/06, 2018.
- (11) Aten JE, Fuller TF, Lusk AJ, Horvath S. Using genetic markers to orient the edges in quantitative trait networks: the NEO software. . *BMC Systems Biology* 2008;2:34.
- (12) Wilke M, Holland SK, Ashburner J, Gaser C. Template-O-Matic: a toolbox for creating customized pediatric templates. *Neuroimage* 2008;41(3):903-913.
- (13) Ashburner J. A fast diffeomorphic image registration algorithm. *Neuroimage* 2007;38(1):95-113.
- (14) Fan L, Li H, Zhuo J, Zhang Y, Wang J, Chen L, et al. The human brainnetome atlas: a new brain atlas based on connective architecture. *Cerebral cortex* 2016;26(8):3508-3526.
